# Supplementary material for: The risk of COVID-19 death is much greater and age-dependent with type I IFN autoantibodies
Source: Res Sq. 2022 Jan 14:rs.3.rs-1225906. Preprint. [Version 1] doi: 10.21203/rs.3.rs-1225906/v1 (PMC8764723; doi:10.21203/rs.3.rs-1225906/v1)
Supplement: Supplement 1 [file 620cd0bef964401d6341b42e.docx]

Supplementary Information

Supplementary Information to: Manry J *et al*. The risk of COVID-19 death is much greater and age-dependent with type I IFN autoantibodies. It contains additional Methods, two Supplementary Figures, seven Supplementary Tables, References, and lists of consortia members.

# Table of Contents

[Table of Contents 1](#_Toc91702939)

[Supplementary Methods 2](#_Toc91702940)

[Supplementary Figures 4](#_Toc91702941)

[Supplementary Figure 1. SARS-CoV-2 infection fatality rates for carriers of various combinations of auto-Abs (IFRAAB) neutralizing low IFN concentrations, by age and sex. 4](#_Toc91702942)

[Supplementary Figure 2. SARS-CoV-2 infection fatality rates for carriers of various combinations of auto-Abs (IFRAAB) neutralizing high IFN concentrations, by age and sex. 5](#_Toc91702943)

[Supplementary Tables 6](#_Toc91702944)

[Supplementary Table 1. Best fitting model for multivariate analysis according to various combinations of auto-Abs neutralizing low concentrations of type I IFNs. 6](#_Toc91702945)

[Supplementary Table 2. Model selection for the age effect of type I IFN auto-Abs on RRD based on the Aikake Information Criterion for Firth's penalized partial likelihood (AICF). 7](#_Toc91702946)

[Supplementary Table 3. Relative risks of COVID-19 death (RRDs) associated with auto-Abs neutralizing low concentrations of various combinations of type I IFNs, by age. 8](#_Toc91702947)

[Supplementary Table 4. Best fitting model for multivariate analysis according to various combinations of auto-Abs neutralizing high concentrations of type I IFNs. 9](#_Toc91702948)

[Supplementary Table 5. Relative risks of COVID-19 death (RRDs) associated with auto-Abs neutralizing high concentrations of various combinations of type I IFNs, by age. 10](#_Toc91702949)

[Supplementary Table 6. SARS-CoV-2 infection fatality rates for individuals with auto-Abs (IFRAAB) neutralizing low concentration of type I IFNs. 11](#_Toc91702950)

[Supplementary Table 7. SARS-CoV-2 infection fatality rates for individuals with auto-Abs (IFRAAB) neutralizing high concentration of type I IFNs. 12](#_Toc91702951)

[References 13](#_Toc91702952)

[List of consortia members 14](#_Toc91702953)

# Supplementary Methods

**Autoantibodies neutralizing type-I IFN**

Auto-Ab determinations were performed as described by Bastard *et al*.1,2. Auto-Ab titers were determined by ELISA (manual or automated). The blocking activity of anti‑IFN‑α2, anti‑IFN‑ω and anti‑IFN‑β auto-Abs was determined on the basis of reporter luciferase activity. Briefly, HEK293T cells were transfected with a plasmid containing the firefly luciferase gene under the control of the human ISRE promoter in the pGL4.45 backbone and a plasmid constitutively expressing the *Renilla* luciferase for normalization (pRL-SV40). Cells were either left unstimulated or were stimulated with IFN‑α2 and IFN‑ω at a concentration of 10 ng/mL (‘high’ *i.e*. supraphysiological concentration) or 100 pg/mL (‘low’, *i.e.* more physiological concentration), or with IFN-β at a concentration of 10 ng/mL (‘high concentration’) for 16 hours at 37°C. We have already shown that auto-Abs neutralizing IFN-α2 are also able to neutralize most of the other 12 subtypes of IFN-α1.

**Relative risks of fatal COVID-19**

We estimated the RRD in patients carrying auto-Abs neutralizing IFN‑α2 and/or IFN‑ω, or auto‑Abs neutralizing IFN‑β relative to patients without such auto-Abs, using large samples of patients who died from COVID‑19 and of individuals from the general population. In this study design, in which controls are sampled from the baseline at-risk population regardless of disease status, odds ratios provide an approximation for RRs in the absence of the assumption of a rare disease3. For each combination of auto-Abs, a Firth’s bias-corrected logistic regression model, including auto-Ab status, sex and age in six classes (20-39, 40-49, 50-59, 60-69, 70-79, ≥80 years, Table S1), was fitted with the logistf package of R software (https://CRAN.R-project.org/package=logistf). For assessments of the effect of age and sex on the RRD due to auto-Abs, we added first order auto-Abs*sex and auto-Abs*age interaction terms to the Firth logistic regression model. For the auto-Abs*age interaction term, age was considered in either six (as defined above) or two (20-69 and ≥70 years) classes, and the model providing the best fit was selected based on the Akaïke information criterion for Firth’s penalized partial likelihood (AICF). Nagashima and Sato used the AICF only in Cox regression models4. We therefore adapted the AICF for use in logistic regression models by fixing the coefficients obtained with our Firth logistic regression models to a classic logistic regression framework with the fix.coef function implemented in R and extracting the resulting AICF (Table S2). *P*values were obtained in penalized likelihood-ratio tests.

**IFR for carriers of neutralizing autoantibodies**

We estimated the IFR for carriers of neutralizing auto-Abs (IFRAAB) infected with SARS‑CoV‑2, using Bayes’ theorem, as follows:

Where P(Death) is the general SARS‑CoV‑2 IFR as estimated by O’Driscoll *et al*.5, P(auto-Abs/Death) is the prevalence of auto-Abs in deceased patients, and P(auto‑Abs) is the prevalence of neutralizing auto-Abs in our general population sample. This later prevalence is a reasonable estimation of the prevalence of auto-Abs in infected individuals (regardless of their COVID-19 phenotypes) with respect to the reported prevalence of auto-Abs in asymptomatic and pauci-symptomatic SARS‑CoV‑2 infected subjects1 which represents the large majority of infected individuals. IFRAAB was then calculated for each auto-Ab combination and by age-class. The IFRAAB and P(auto-Abs) were estimated for the six age classes defined above, but P(auto-Abs/Death) was estimated for two age classes only (20-69 and ≥70 years) (Table S6, Table S7). Indeed, consistent with our RRD estimations for fatal COVID-19 in patients carrying auto-Abs *versus* non-carriers, the best-fit model for the effect of age on the prevalence of auto-Abs in deceased patients was obtained with the two age classes 20-69 and ≥70 years. The prevalences of neutralizing auto‑Abs in the general population were estimated by Agresti-Coull adjustment, to avoid null values6. The confidence intervals of the IFRsAAB were estimated by Monte-Carlo simulation. We estimated the empirical distribution of IFRAAB, by randomly drawing values for IFR, P(auto‑Abs/Death) and P(auto‑Abs) based on their observed means and variances, assuming a normal distribution, and recomputing IFRAAB. We simulated 10,000 replicates for which IFRAAB (%) lay within the (0, 100] interval, and determined empirical 95% confidence intervals.

# Supplementary **Figures**

## **Supplementary Figure 1.** SARS-CoV-2 infection fatality rates for carriers of various combinations of auto-Abs (IFRAAB) neutralizing low IFN concentrations, by age and sex.


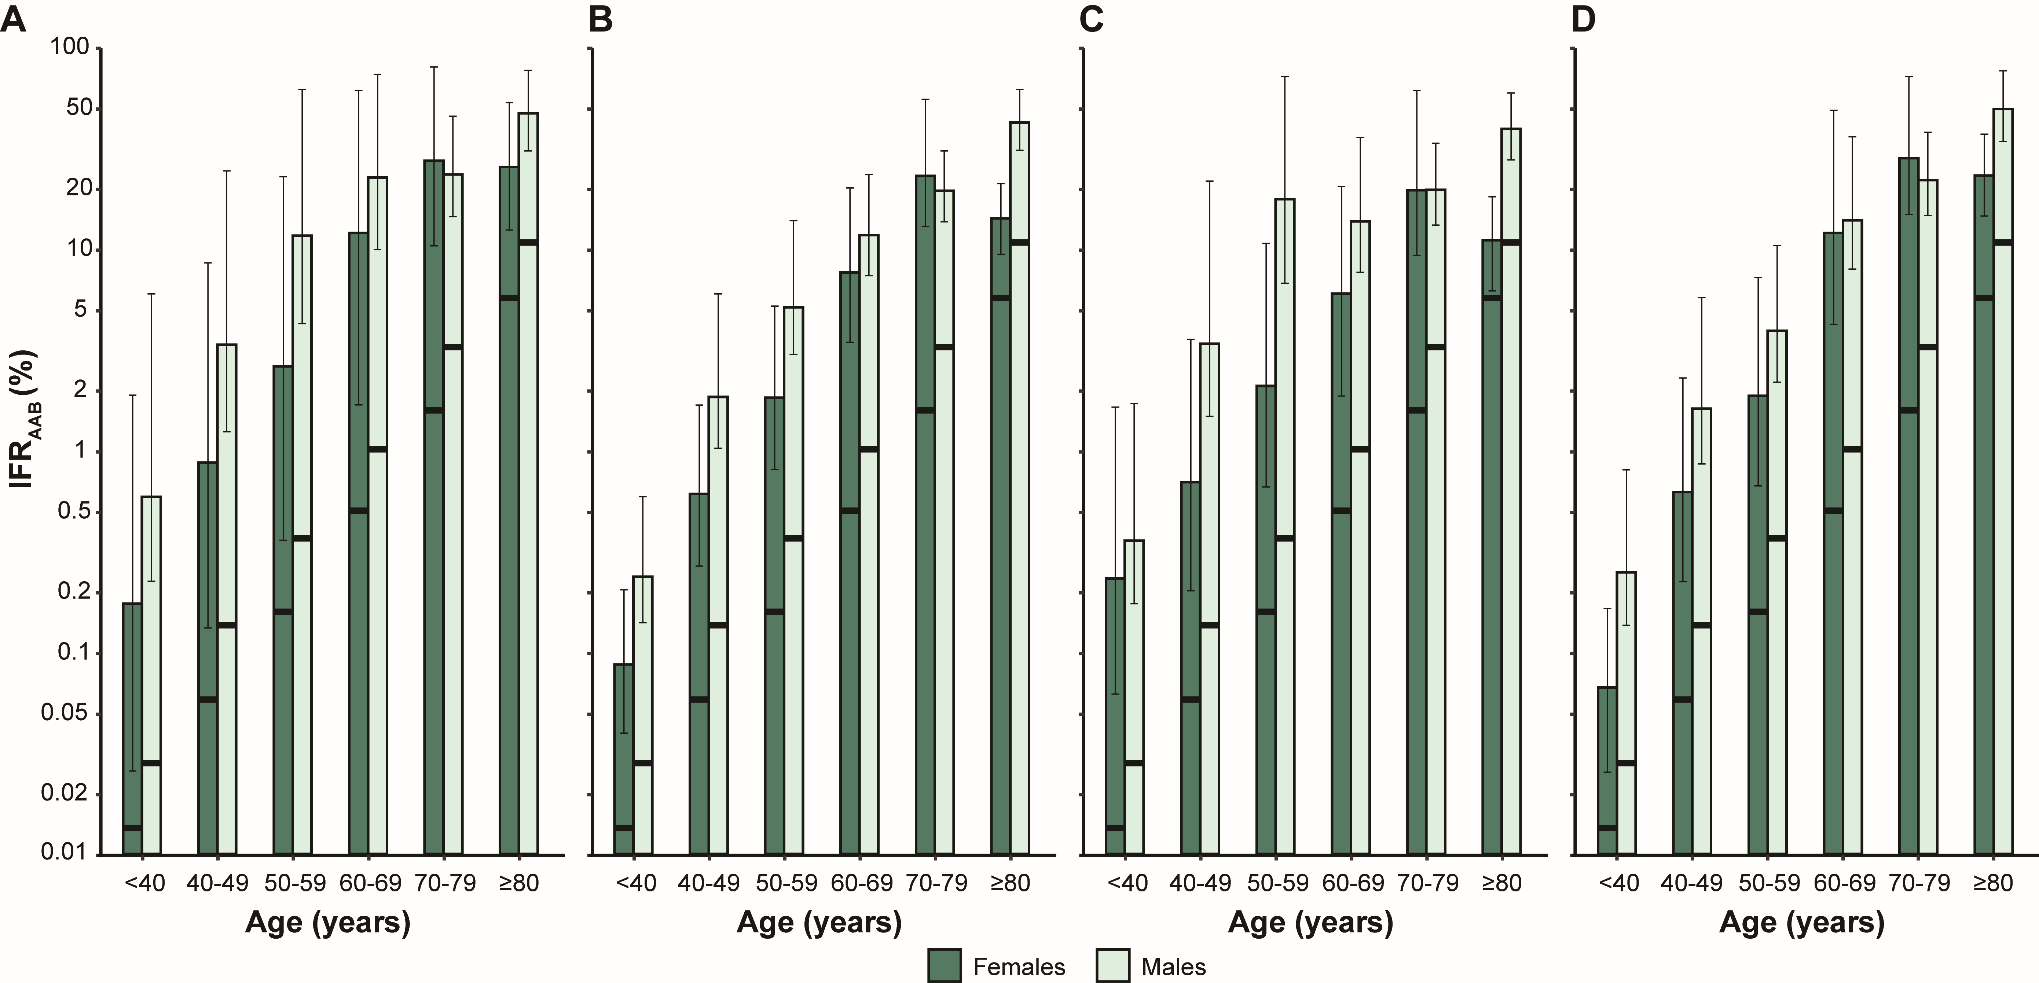


IFRsAAB are displayed, by age and sex, for individuals with auto Abs neutralizing low concentrations of (A) IFN α2 and IFN ω, (B) IFN α2 or IFN ω, (C) IFN α2, and (D) IFN ω. Vertical bars represent the 95% CI. Horizontal black lines represent the IFR reported by O’Driscoll et al. 5

## **Supplementary Figure 2.** SARS-CoV-2 infection fatality rates for carriers of various combinations of auto-Abs (IFRAAB) neutralizing high IFN concentrations, by age and sex.


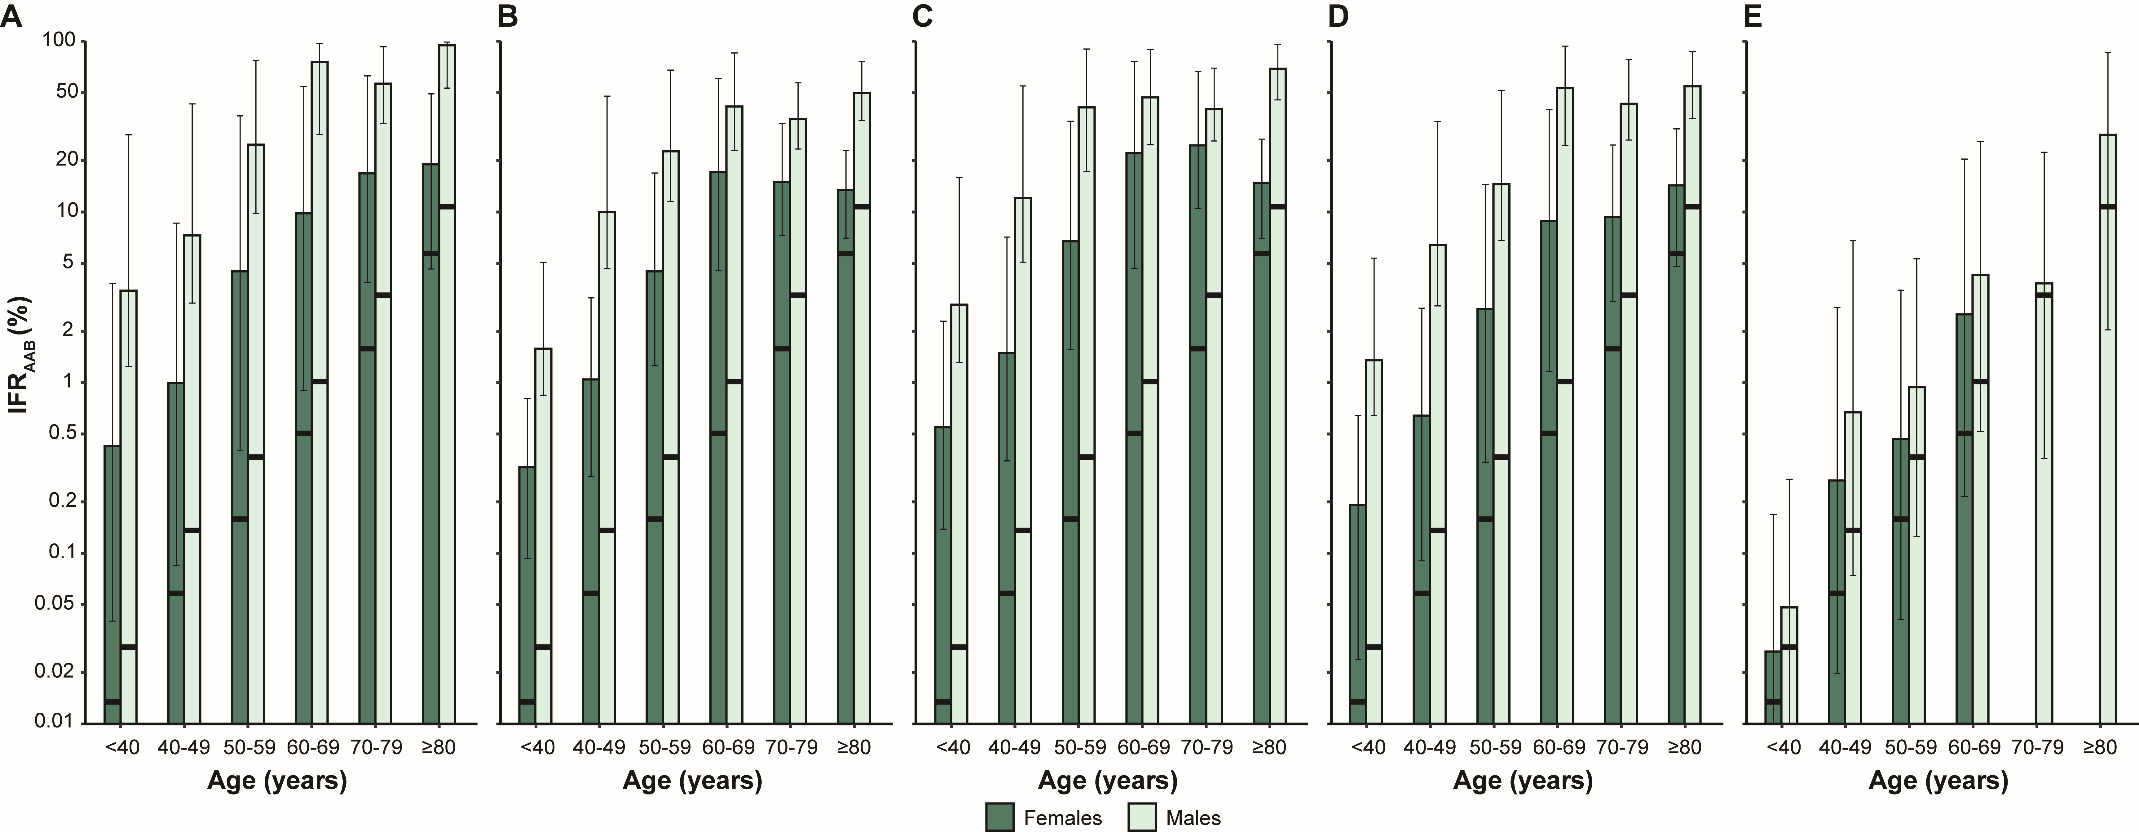


IFRsAAB are displayed, by age and sex, for individuals with auto Abs neutralizing high concentrations of (A) IFN α2 and IFN ω, (B) IFN α2 or IFN ω, (C) IFN α2, (D) IFN ω and (E) IFN-β. Vertical bars represent the 95% CI. Horizontal black lines represent the IFR reported by O’Driscoll et al. 5 No woman over the age of 70 years carrying auto-Abs neutralizing IFN-β was identified among the patients who had died from COVID-19.

# **Supplementary Tables**

## **Supplementary Table 1.** Best fitting model for multivariate analysis according to various combinations of auto-Abs neutralizing low concentrations of type I IFNs.

|  |  | **IFN-α and IFN-ω** | | | **IFN-α or IFN-ω** | | | **IFN-α** | | | **IFN-ω** | | |
| --- | --- | --- | --- | --- | --- | --- | --- | --- | --- | --- | --- | --- | --- |
| **Covariate** | | **β (SE)** | **RRD** | ***P* value** | **β (SE)** | **RRD** | ***P* value** | **β (SE)** | **RRD** | ***P* value** | **β (SE)** | **RRD** | ***P* value** |
| **Sex** | **Female *vs.* Male** | -0.90 (0.07) | 0.41 | <10-16 | -0.93 (0.07) | 0.40 | <10-16 | -0.92 (0.07) | 0.40 | <10-16 | -0.92 (0.07) | 0.40 | <10-16 |
| **Age (years)** | **20-39 yr** | ref | ref | - | ref | ref | - | ref | ref | - | ref | ref | - |
|  | **40-49 yr** | 0.82 (0.30) | 2.27 | 0.0041 | 0.83 (0.29) | 2.29 | 0.0029 | 0.77 (0.29) | 2.17 | 0.0056 | 0.84 (0.29) | 2.31 | 0.0027 |
|  | **50-59 yr** | 1.82 (0.27) | 6.16 | 10-16 | 1.84 (0.26) | 6.28 | <10-16 | 1.79 (0.26) | 6.02 | 10-16 | 1.82 (0.26) | 6.19 | <10-16 |
|  | **60-69 yr** | 2.21 (0.26) | 9.15 | <10-16 | 2.21 (0.25) | 9.09 | <10-16 | 2.14 (0.25) | 8.52 | <10-16 | 2.24 (0.25) | 9.36 | <10-16 |
|  | **70-79 yr** | 2.51 (0.26) | 12.27 | <10-16 | 2.54 (0.26) | 12.70 | <10-16 | 2.48 (0.24) | 11.98 | <10-16 | 2.53 (0.26) | 12.50 | <10-16 |
|  | **≥80 yr** | 2.32 (0.26) | 10.22 | <10-16 | 2.30 (0.26) | 9.97 | <10-16 | 2.27 (0.25) | 9.72 | <10-16 | 2.31 (0.26) | 10.10 | <10-16 |
| **auto-Abs** | **yes *vs.* no** | 5.25 (0.71) | 189.68a | <10-16 | 2.82 (0.19) | 16.71a | <10-16 | 3.32 (0.27) | 27.78a | <10-16 | 2.92 (0.22) | 18.57a | <10-16 |
| **auto-Abs*Agea** | **≥70 *vs.* <70** | -3.30 (0.73) | 7.03b | 8×10-10 | -1.05 (0.23) | 5.85b | 4×10-6 | -1.72 (0.31) | 4.96b | 6×10-9 | -0.92 (0.27) | 7.41b | 0.0005 |

Age-stratified analysis using Firth's logistic regression model integrating sex and auto-Abs*Age (<70 and ≥70 years) as covariates.

β, Relative risks of COVID-19 death (RRD) and *P* values for each covariate are displayed. Male sex, and <40 years age-classe were used as reference.

NA: not applicable; SE: standard error, ref: reference.

aRRD for <70y.o. individuals displaying auto-Abs neutralizing IFN relative to those who do not as reference, computed as exp(βauto-Abs).

bRRD for individuals ≥70 y.o. individuals displaying auto-Abs neutralizing IFN relative to those who do not as reference, the interaction term 'auto-Abs*Age' was calculated as follows: exp(βauto-Abs + βauto-Abs*Age).

## Supplementary **Table 2.** Model selection for the age effect of type I IFN auto-Abs on RRD based on the Aikake Information Criterion for Firth's penalized partial likelihood (AICF).

| **Neutralized IFN** | **Dose** | **AICF.6a** | **AICF.2b** |
| --- | --- | --- | --- |
| IFN-α and -ω | 100pg/mL | 680.92 | **676.69** |
| IFN-α or -ω | 1063.74 | **1060.59** |
| IFN-α | 844.08 | **840.37** |
| IFN-ω | 939.02 | **934.72** |
| IFN-α and -ω | 10ng/mL | 533.82 | **533.10** |
| IFN-α or -ω | 796.76 | **791.93** |
| IFN-α | 747.42 | **742.17** |
| IFN-ω | 595.11 | **595.65** |
| IFN-β | 69.91 | **71.71** |

The age effect of type I IFN auto-Abs on RRD was estimated through the interaction term auto-Abs*age with age considered in two (Age.2) or six (Age.6) classes.

Age.2 corresponds to [20, 70) and ≥70 years old classes; Age.6 corresponds to [20, 40), [40, 50), [50, 60), [60, 70), [70, 80) and ≥80 years old classes.

The best fitting models were selected according to the smallest AICF values, and are shown in bold. When ΔAICF < 2, we chose the most parsimonious model, thus displaying the smaller number of parameters (i.e. with 2 age classes only), as usually done.

aAICF obtained using the following logistic model: Death ~ auto-Abs status + Sex + Age.6 + auto-Abs*Age.6.

bAICF obtained using the following logistic model: Death ~ auto-Abs status + Sex + Age.6.Classes + auto-Abs*Age.2.

## **Supplementary Table 3.** Relative risks of COVID-19 death (RRDs) associated with auto-Abs neutralizing low concentrations of various combinations of type I IFNs, by age.

| **Neutralized IFN** | **Age class** | ***P* value** | **RRD** | **RRD CI95 lower** | **RRD CI95 upper** |
| --- | --- | --- | --- | --- | --- |
| IFN-α and -ω | 20-69 yr | <10-16 | 188.32 | 45.79 | 774.41 |
| ≥70 yr | <10-16 | 7.20 | 5.04 | 10.30 |
| IFN-α or -ω | 20-69 yr | <10-16 | 17.01 | 11.69 | 24.75 |
| ≥70 yr | <10-16 | 5.76 | 4.47 | 7.44 |
| IFN-α | 20-69 yr | <10-16 | 28.66 | 16.78 | 48.96 |
| ≥70 yr | <10-16 | 4.98 | 3.72 | 6.68 |
| IFN-ω | 20-69 yr | <10-16 | 18.62 | 11.97 | 28.98 |
| ≥70 yr | <10-16 | 7.34 | 5.50 | 9.79 |

Age-stratified analysis using Firth's logistic regression model integrating sex and age classes ([20, 40), [40, 50), [50, 60) and [60, 70) for patients <70 years old; and [70, 80) and ≥80 for patients ≥70 years old) as covariates. RRDs are displayed for individuals under and over 70 years of age.

CI95: 95% Confidence interval.

## **Supplementary Table 4.** Best fitting model for multivariate analysis according to various combinations of auto-Abs neutralizing high concentrations of type I IFNs.

|  |  | **IFN-α and IFN-ω** | | | **IFN-α or IFN-ω** | | | **IFN-α** | | | **IFN-ω** | | | **IFN-β** | | |
| --- | --- | --- | --- | --- | --- | --- | --- | --- | --- | --- | --- | --- | --- | --- | --- | --- |
| **Covariate** | | **β (SE)** | **RRD** | ***P* value** | **β (SE)** | **RRD** | ***P* value** | **β (SE)** | **RRD** | ***P* value** | **β (SE)** | **RRD** | ***P* value** | **β (SE)** | **RRD** | ***P* value** |
| **Sex** | **Female *vs* Male** | -0.84 (0.07) | 0.43 | <10-16 | -0.86 (0.07) | 0.42 | <10-16 | -0.86 (0.07) | 0.42 | <10-16 | -0.85 (0.07) | 0.43 | <10-16 | -1.07 (0.12) | 0.34 | <10-16 |
| **Age (years)** | **20-39 yr** | ref | ref | - | ref | ref | - | ref | ref | - | ref | ref | - | ref | ref | - |
|  | **40-49 yr** | 1.60 (0.29) | 4.98 | 2×10-9 | 1.63 (0.29) | 5.10 | 10-9 | 1.61 (0.30) | 5.00 | 2×10-9 | 1.62 (0.29) | 5.07 | 10-9 | 0.53 (0.49) | 1.70 | 0.27 |
|  | **50-59 yr** | 2.55 (0.27) | 12.84 | <10-16 | 2.60 (0.27) | 13.43 | <10-16 | 2.59 (0.27) | 13.27 | <10-16 | 2.57 (0.27) | 13.12 | <10-16 | 2.06 (0.41) | 7.87 | 6×10-11 |
|  | **60-69 yr** | 3.09 (0.26) | 22.08 | <10-16 | 3.12 (0.26) | 22.56 | <10-16 | 3.10 (0.26) | 22.14 | <10-16 | 3.12 (0.26) | 22.66 | <10-16 | 2.56 (0.40) | 12.88 | <10-16 |
|  | **70-79 yr** | 3.74 (0.26) | 41.93 | <10-16 | 3.79 (0.26) | 44.47 | <10-16 | 3.77 (0.26) | 43.45 | <10-16 | 3.77 (0.26) | 43.38 | <10-16 | 3.07 (0.40) | 21.56 | <10-16 |
|  | **≥80 yr** | 4.11 (0.25) | 60.80 | <10-16 | 4.12 (0.26) | 61.44 | <10-16 | 4.10 (0.26) | 60.55 | <10-16 | 4.13 (0.26) | 62.00 | <10-16 | NA | NA | NA |
| **auto-Abs** | **yes vs no** | 5.05 (0.50) | 156.99a | <10-16 | 4.11 (0.24) | 60.80a | <10-16 | 4.63 (0.31) | 102.79a | <10-16 | 3.96 (0.30) | 52.70a | <10-16 | 1.93 (0.59) | 6.91a | 0.004 |
| **auto-Abs*Agea** | **<70 vs ≥70** | -2.51 (0.55) | 12.68b | 2×10-7 | -2.19 (0.29) | 6.81b | 10-14 | -2.48 (0.35) | 8.62b | 5×10-14 | -1.94 (0.35) | 7.61b | 4×10-8 | -0.84 (1.00) | 2.97b | 0.37 |

Age-stratified analysis using Firth's logistic regression model integrating sex and auto-Abs*Age (<70 and ≥70 years) as covariates.

β, Relative risks of COVID-19 death (RRD) and P values for each covariate are displayed. Male sex, and <40 years age-classes were used as reference.

NA: not applicable; SE: standard error, ref: reference.

aRRD for <70y.o. individuals displaying auto-Abs neutralizing IFN relative to those who do not as reference, computed as exp(βauto-Abs).

bRRD for individuals ≥70 y.o. individuals displaying auto-Abs neutralizing IFN relative to those who do not as reference, the interaction term 'auto-Abs*Age' was calculated as follows: exp(βauto-Abs + βauto-Abs*Age).

## **Supplementary Table 5.** Relative risks of COVID-19 death (RRDs) associated with auto-Abs neutralizing high concentrations of various combinations of type I IFNs, by age.

| **Neutralized IFN** | **Age class** | ***P* value** | **RRD** | **RRD CI95 lower** | **RRD CI95 upper** |
| --- | --- | --- | --- | --- | --- |
| IFN-α and -ω | 20-69 yr | <10-16 | 156.47 | 57.82 | 423.37 |
| ≥70 yr | <10-16 | 12.93 | 8.39 | 19.94 |
| IFN-α or -ω | 20-69 yr | <10-16 | 62.36 | 38.37 | 101.35 |
| ≥70 yr | <10-16 | 6.83 | 5.08 | 9.17 |
| IFN-α | 20-69 yr | <10-16 | 105.10 | 57.18 | 193.20 |
| ≥70 yr | <10-16 | 8.64 | 6.26 | 11.92 |
| IFN-ω | 20-69 yr | <10-16 | 53.58 | 29.37 | 97.74 |
| ≥70 yr | <10-16 | 7.72 | 5.39 | 11.04 |
| IFN-β | 20-69 yr | 0.004 | 6.98 | 2.18 | 22.36 |
| ≥70 yr | 0.229 | 2.67 | 0.56 | 12.81 |

Age-stratified analysis using Firth's logistic regression model integrating sex and age classes ([20, 40), [40, 50), [50, 60) and [60, 70) for patients <70 years old; and [70, 80) and ≥80 for patients ≥70 years old) as covariates. RRDs are displayed for individuals under and over 70 years of age.

CI95: 95% Confidence interval.

## **Supplementary Table 6.** SARS-CoV-2 infection fatality rates for individuals with auto-Abs (IFRAAB) neutralizing low concentration of type I IFNs.

| **Neutralized IFN** | **Age group** | **IFRAABa (%)** | **IFRAAB CI95 lower (%)** | **IFRAAB CI95 upper (%)** | **IFRb (%)** | **P(auto-Abs)c (%)** | **P(auto-Abs/Death)d (%)** |
| --- | --- | --- | --- | --- | --- | --- | --- |
| IFN-α2 and IFN-ω | 20-39 yr | 0.84 | 0.31 | 8.28 | 0.02 | 0.16 | 6.46 |
| 40-49 yr | 4.63 | 1.71 | 34.71 | 0.10 | 0.14 | 6.46 |
| 50-59 yr | 14.89 | 5.55 | 67.61 | 0.27 | 0.11 | 6.46 |
| 60-69 yr | 30.64 | 13.31 | 83.29 | 0.77 | 0.16 | 6.46 |
| 70-79 yr | 26.04 | 16.49 | 48.01 | 2.44 | 1.06 | 11.31 |
| ≥80 yr | 40.47 | 27.82 | 61.20 | 8.29 | 2.32 | 11.31 |
| IFN-α2 or IFN-ω | 20-39 yr | 0.17 | 0.12 | 0.31 | 0.02 | 1.83 | 15.26 |
| 40-49 yr | 1.37 | 0.86 | 2.77 | 0.10 | 1.09 | 15.26 |
| 50-59 yr | 3.91 | 2.49 | 7.53 | 0.27 | 1.03 | 15.26 |
| 60-69 yr | 11.14 | 7.36 | 19.07 | 0.77 | 1.05 | 15.26 |
| 70-79 yr | 20.85 | 15.04 | 31.46 | 2.44 | 2.40 | 20.49 |
| ≥80 yr | 26.66 | 20.28 | 35.20 | 8.29 | 6.37 | 20.49 |
| IFN-α2 | 20-39 yr | 0.44 | 0.23 | 1.88 | 0.02 | 0.48 | 10.18 |
| 40-49 yr | 2.43 | 1.24 | 9.95 | 0.10 | 0.41 | 10.18 |
| 50-59 yr | 9.38 | 4.59 | 38.49 | 0.27 | 0.29 | 10.18 |
| 60-69 yr | 12.07 | 7.28 | 24.73 | 0.77 | 0.65 | 10.18 |
| 70-79 yr | 20.36 | 13.98 | 33.26 | 2.44 | 1.73 | 14.43 |
| ≥80 yr | 25.02 | 18.23 | 34.25 | 8.29 | 4.78 | 14.43 |
| IFN-ω | 20-39 yr | 0.16 | 0.10 | 0.31 | 0.02 | 1.51 | 11.55 |
| 40-49 yr | 1.38 | 0.80 | 3.24 | 0.10 | 0.82 | 11.55 |
| 50-59 yr | 3.55 | 2.15 | 7.46 | 0.27 | 0.86 | 11.55 |
| 60-69 yr | 15.65 | 9.41 | 33.23 | 0.77 | 0.56 | 11.55 |
| 70-79 yr | 24.52 | 17.03 | 39.35 | 2.44 | 1.73 | 17.38 |
| ≥80 yr | 36.84 | 27.17 | 50.46 | 8.29 | 3.91 | 17.38 |

aCOVID-19 fatality rate for individuals with auto-Abs.

bIFR provided by O'Driscoll et al.5

cPrevalence of auto-Abs in the general population.

dPrevalence of auto-Abs among COVID-19 death.

CI95: 95% Confidence interval.

## **Supplementary Table 7.** SARS-CoV-2 infection fatality rates for individuals with auto-Abs (IFRAAB) neutralizing high concentration of type I IFNs.

| **Neutralized IFN** | **Age group** | **IFRAABa (%)** | **IFRAAB CI95 lower (%)** | **IFRAAB CI95 upper (%)** | **IFRAABb (%)** | **P(auto-Abs)c (%)** | **P(auto-Abs/Death)d (%)** |
| --- | --- | --- | --- | --- | --- | --- | --- |
| IFN-α2 and IFN-ω | 20-39 yr | 3.13 | 1.26 | 20.82 | 0.02 | 0.03 | 4.97 |
| 40-49 yr | 6.58 | 2.83 | 33.71 | 0.10 | 0.07 | 4.97 |
| 50-59 yr | 28.18 | 11.12 | 80.90 | 0.27 | 0.05 | 4.97 |
| 60-69 yr | 65.49 | 26.37 | 96.22 | 0.77 | 0.06 | 4.97 |
| 70-79 yr | 48.03 | 28.40 | 86.69 | 2.44 | 0.43 | 8.46 |
| ≥80 yr | 68.65 | 42.52 | 95.81 | 8.29 | 1.02 | 8.46 |
| IFN-α2 or IFN-ω | 20-39 yr | 0.92 | 0.57 | 1.74 | 0.02 | 0.22 | 9.74 |
| 40-49 yr | 4.30 | 2.49 | 10.02 | 0.10 | 0.22 | 9.74 |
| 50-59 yr | 15.06 | 8.52 | 37.28 | 0.27 | 0.17 | 9.74 |
| 60-69 yr | 36.67 | 21.54 | 74.41 | 0.77 | 0.20 | 9.74 |
| 70-79 yr | 28.29 | 19.99 | 42.69 | 2.44 | 1.18 | 13.71 |
| ≥80 yr | 32.64 | 23.56 | 45.17 | 8.29 | 3.48 | 13.71 |
| IFN-α2 | 20-39 yr | 1.84 | 1.01 | 5.43 | 0.02 | 0.10 | 8.75 |
| 40-49 yr | 6.62 | 3.41 | 21.70 | 0.10 | 0.13 | 8.75 |
| 50-59 yr | 29.76 | 14.14 | 79.91 | 0.27 | 0.08 | 8.75 |
| 60-69 yr | 46.10 | 25.20 | 87.94 | 0.77 | 0.15 | 8.75 |
| 70-79 yr | 36.69 | 24.81 | 60.02 | 2.44 | 0.83 | 12.52 |
| ≥80 yr | 40.94 | 28.85 | 58.60 | 8.29 | 2.54 | 12.52 |
| IFN-ω | 20-39 yr | 0.80 | 0.44 | 1.84 | 0.02 | 0.15 | 5.96 |
| 40-49 yr | 3.51 | 1.79 | 10.05 | 0.10 | 0.17 | 5.96 |
| 50-59 yr | 11.27 | 5.85 | 32.27 | 0.27 | 0.14 | 5.96 |
| 60-69 yr | 39.29 | 19.76 | 84.43 | 0.77 | 0.12 | 5.96 |
| 70-79 yr | 30.21 | 19.59 | 50.32 | 2.44 | 0.78 | 9.64 |
| ≥80 yr | 40.63 | 27.03 | 61.55 | 8.29 | 1.97 | 9.64 |
| IFN-β | 20-39 yr | 0.04 | 0.01 | 0.16 | 0.02 | 0.77 | 1.62 |
| 40-49 yr | 0.72 | 0.10 | 5.71 | 0.10 | 0.22 | 1.62 |
| 50-59 yr | 0.86 | 0.15 | 3.21 | 0.27 | 0.50 | 1.62 |
| 60-69 yr | 4.43 | 0.66 | 20.25 | 0.77 | 0.28 | 1.62 |
| 70-79 yr | 2.21 | 0.22 | 9.32 | 2.44 | 0.57 | 0.51 |
| ≥80 yr | 31.04 | 2.37 | 88.06 | 8.29 | 0.14 | 0.51 |

aCOVID-19 fatality rate for individuals with auto-Abs

bIFR provided by O'Driscoll et al. 5

cPrevalence of auto-Abs in the general population

dPrevalence of auto-Abs among COVID-19 death

CI95: 95% Confidence interval

# References

1. Bastard P, Gervais A, Le Voyer T, et al. Autoantibodies neutralizing type I IFNs are present in ~4% of uninfected individuals over 70 years old and account for ~20% of COVID-19 deaths. *Sci Immunol.* 2021;6(62).

2. Bastard P, Michailidis E, Hoffmann HH, et al. Auto-antibodies to type I IFNs can underlie adverse reactions to yellow fever live attenuated vaccine. *J Exp Med.* 2021;218(4).

3. Morabia A, Ten Have T, Landis JR. Empirical evaluation of the influence of control selection schemes on relative risk estimation: the Welsh nickel workers study. *Occup Environ Med.* 1995;52(7):489-493.

4. Nagashima K, Sato Y. Information criteria for Firth's penalized partial likelihood approach in Cox regression models. *Stat Med.* 2017;36(21):3422-3436.

5. O'Driscoll M, Ribeiro Dos Santos G, Wang L, et al. Age-specific mortality and immunity patterns of SARS-CoV-2. *Nature.* 2021;590(7844):140-145.

6. Agresti A, Coull BA. Approximate is better than “exact” for interval estimation of binomial proportions. *Am Stat.* 1998;52:119-126.

# List of consortia members

**Members of the HGID Lab:** Peng Zhang1, Yoann Seeleuthner2,3, Estelle Talouarn2,3, Astrid Marchal2,3, Daniela Matuozzo2,3, Aliénor de la Chapelle2, Jie Chen1, Maya Chrabieh2,3, Dana Liu1, Yelena Nemirowskaya1, Inés Marín Cruz2, Marie Materna2,3, Sophie Pelet2, Chloé Thibault2,3, Zhiyong Liu1

1St. Giles Laboratory of Human Genetics of Infectious Diseases, Rockefeller Branch, The Rockefeller University, New York, NY, USA. 2Laboratory of Human Genetics of Infectious Diseases, Necker Branch, INSERM U1163, Necker Hospital for Sick Children, Paris, France. 3University of Paris, Imagine Institute, Paris, France.

**Members of the COVID Clinicians:** Jorge Abad1, Giulia Accordino2, Cristian Achille3, Sergio Aguilera-Albesa4, Aina Aguiló-Cucurull5, Alessandro Aiuti6, Esra Akyüz Özkan7, Ilad Alavi Darazam8, Jonathan Antonio Roblero Albisures9, Juan C. Aldave10, Miquel Alfonso Ramos11, Taj Ali Khan12, Anna Aliberti13, Seyed Alireza Nadji14, Gulsum Alkan15, Suzan A. AlKhater16, Jerome Allardet-Servent17, Luis M. Allende18, Rebeca Alonso-Arias19, Mohammed S. Alshahrani20, Laia Alsina21, Marie-Alexandra Alyanakian22, Blanca Amador Borrero23, Zahir Amoura24, Arnau Antolí25, Romain Arrestier26, Mélodie Aubart27, Teresa Auguet28, Iryna Avramenko29, Gökhan Aytekin30, Axelle Azot31, Seiamak Bahram32, Fanny Bajolle33, Fausto Baldanti34, Aurélie Baldolli35, Maite Ballester36, Hagit Baris Feldman37, Benoit Barrou38, Federica Barzaghi6, Sabrina Basso39, Gulsum Iclal Bayhan40, Alexandre Belot41, Liliana Bezrodnik42, Agurtzane Bilbao43, Geraldine Blanchard-Rohner44, Ignacio Blanco45, Adeline Blandinières46, Daniel Blázquez-Gamero47, Alexandre Bleibtreu48, Marketa Bloomfield49, Mireia Bolivar-Prados50, Anastasiia Bondarenko51, Alessandro Borghesi3, Raphael Borie52, Elisabeth Botdhlo-Nevers53, Ahmed A. Bousfiha54, Aurore Bousquet55, David Boutolleau56, Claire Bouvattier57, Oksana Boyarchuk58, Juliette Bravais59, M. Luisa Briones60, Marie-Eve Brunner61, Raffaele Bruno62, Maria Rita P. Bueno63, Huda Bukhari64, Jacinta Bustamante33, Juan José Cáceres Agra65, Ruggero Capra66, Raphael Carapito67, Maria Carrabba68, Giorgio Casari6, Carlos Casasnovas69, Marion Caseris70, Irene Cassaniti34, Martin Castelle71, Francesco Castelli72, Martín Castillo de Vera73, Mateus V. Castro63, Emilie Catherinot74, Jale Bengi Celik75, Alessandro Ceschi76, Martin Chalumeau77, Bruno Charbit78, Matthew P. Cheng79, Pere Clavé50, Bonaventura Clotet80, Anna Codina81, Yves Cohen82, Roger Colobran83, Cloé Comarmond84, Alain Combes85, Patrizia Comoli39, Angelo G. Corsico2, Taner Coşkuner86, Aleksandar Cvetkovski87, Cyril Cyrus88, David Dalmau89, François Danion90, David Ross Darley91, Vincent Das92, Nicolas Dauby93, Stéphane Dauger94, Paul De Munter95, Loic de Pontual96, Amin Dehban97, Geoffroy Delplancq98, Alexandre Demoule99, Isabelle Desguerre100, Antonio Di Sabatino101, Jean-Luc Diehl102, Stephanie Dobbelaere103, Elena Domínguez-Garrido104, Clément Dubost105, Olov Ekwall106, Şefika Elmas Bozdemir107, Marwa H. Elnagdy108, Melike Emiroglu15, Akifumi Endo109, Emine Hafize Erdeniz110, Selma Erol Aytekin111, Maria Pilar Etxart Lasa112, Romain Euvrard113, Giovanna Fabio68, Laurence Faivre114, Antonin Falck115, Muriel Fartoukh116, Morgane Faure117, Miguel Fernandez Arquero118, Ricard Ferrer119, Jose Ferreres120, Carlos Flores121, Bruno Francois122, Victoria Fumadó123, Kitty S. C. Fung124, Francesca Fusco125, Alenka Gagro126, Blanca Garcia Solis127, Pascale Gaussem128, Zeynep Gayretli129, Juana Gil-Herrera130, Laurent Gilardin131, Audrey Giraud Gatineau132, Mònica Girona-Alarcón133, Karen Alejandra Cifuentes Godínez134, Jean-Christophe Goffard135, Nacho Gonzales136, Luis I. Gonzalez-Granado137, Rafaela González-Montelongo138, Antoine Guerder139, Belgin Gülhan140, Victor Daniel Gumucio141, Leif Gunnar Hanitsch142, Jan Gunst143, Marta Gut144, Jérôme Hadjadj145, Filomeen Haerynck146, Rabih Halwani147, Lennart Hammarström148, Selda HANCERLI149, Tetyana Hariyan150, Nevin Hatipoglu151, Deniz Heppekcan152, Elisa Hernandez-Brito153, Po-ki Ho154, María Soledad Holanda-Peña155, Juan P. Horcajada156, Sami Hraiech157, Linda Humbert158, Ivan F. N. Hung159, Alejandro D. Iglesias160, Antonio Íñigo-Campos138, Matthieu Jamme161, María Jesús Arranz89, Marie-Thérèse Jimeno162, Iolanda Jordan133, Saliha Kanık-Yüksek163, Yalcin Burak Kara164, Aydın Karahan165, Adem Karbuz166, Kadriye Kart Yasar167, Ozgur Kasapcopur168, Kenichi Kashimada169, Sevgi Keles111, Yasemin Kendir Demirkol170, Yasutoshi Kido171, Can Kizil172, Ahmet Osman Kılıç173, Adam Klocperk174, Maria Daganou175, Evangelia Koukaki175, Antonia Koutsoukou175, Vasiliki Rapti175, Konstantinos Syrigos175, Zbigniew J. Król176, Hatem Ksouri177, Paul Kuentz178, Arthur M. C. Kwan179, Yat Wah M. Kwan180, Janette S. Y. Kwok181, Jean-Christophe Lagier182, David S. Y. Lam183, Francesca Conti184, Andrea Pession184, Vicky Lampropoulou310, Fanny Lanternier185, Yu-Lung Lau186, Fleur Le Bourgeois94, Yee-Sin Leo187, Rafael Leon Lopez188, Daniel Leung186, Michael Levin189, Michael Levy94, Romain Lévy33, Zhi Li78, Daniele Lilleri34, Edson Jose Adrian Bolanos Lima190, Agnes Linglart191, Eduardo López-Collazo192, José M. Lorenzo-Salazar138, Céline Louapre193, Catherine Lubetzki193, Kwok-Cheung Lung194, Charles-Edouard Luyt195, David C. Lye196, Cinthia Magnone197, Davood Mansouri198, Enrico Marchioni199, Carola Marioli2, Majid Marjani200, Laura Marques201, Jesus Marquez Pereira202, Andrea Martín-Nalda203, David Martínez Pueyo204, Javier Martinez-Picado205, Iciar Marzana206, Carmen Mata-Martínez207, Alexis Mathian24, Larissa RB Matos63, Gail V. Matthews208, Julien Mayaux209, Raquel McLaughlin-Garcia210, Philippe Meersseman211, Jean-Louis Mège212, Armand Mekontso-Dessap213, Isabelle Melki115, Federica Meloni2, Jean-François Meritet214, Paolo Merlani215, Özge Metin Akcan216, Isabelle Meyts217, Mehdi Mezidi218, Isabelle Migeotte219, Maude Millereux220, Matthieu Million221, Tristan Mirault222, Clotilde Mircher223, Mehdi Mirsaeidi224, Yoko Mizoguchi225, Bhavi P. Modi226, Francesco Mojoli13, Elsa Moncomble227, Abián Montesdeoca Melián228, Antonio Morales Martinez229, Francisco Morandeira230, Pierre-Emmanuel Morange231, Clémence Mordacq158, Guillaume Morelle232, Stéphane J. Mouly233, Adrián Muñoz-Barrera138, Cyril Nafati234, Shintaro Nagashima235, Yu Nakagama171, Bénédicte Neven236, João Farela Neves237, Lisa F. P. Ng238, Yuk-Yung Ng239, Hubert Nielly105, Yeray Novoa Medina210, Esmeralda Nuñez Cuadros240, J. Gonzalo Ocejo-Vinyals241, Keisuke Okamoto109, Mehdi Oualha33, Amani Ouedrani22, Tayfun Özçelik242, Aslinur Ozkaya-Parlakay140, Michele Pagani13, Qiang Pan-Hammarström148, Maria Papadaki310, Christophe Parizot209, Philippe Parola244, Tiffany Pascreau245, Stéphane Paul246, Estela Paz-Artal247, Sigifredo Pedraza-Sánchez248, José Luis Gálvez-Romero248, Nancy Carolina González Pellecer134, Silvia Pellegrini249, Rebeca Pérez de Diego127, Xosé Luis Pérez-Fernández141, Aurélien Philippe250, Quentin Philippot116, Adrien Picod251, Marc Pineton de Chambrun85, Antonio Piralla34, Laura Planas-Serra252, Dominique Ploin253, Julien Poissy254, Géraldine Poncelet70, Garyphallia Poulakou175, Marie S. Pouletty255, Persia Pourshahnazari256, Jia Li Qiu-Chen257, Paul Quentric209, Thomas Rambaud258, Didier Raoult212, Violette Raoult259, Anne-Sophie Rebillat223, Claire Redin260, Léa Resmini261, Pilar Ricart262, Jean-Christophe Richard263, Raúl Rigo-Bonnin264, Nadia rivet46, Jacques G. Rivière265, Gemma Rocamora-Blanch25, Mathieu P. Rodero266, Carlos Rodrigo267, Luis Antonio Rodriguez190, Carlos Rodriguez-Gallego268, Agustí Rodriguez-Palmero269, Carolina Soledad Romero270, Anya Rothenbuhler271, Damien Roux272, Nikoletta Rovina175, Flore Rozenberg273, Yvon Ruch90, Montse Ruiz274, Maria Yolanda Ruiz del Prado275, Juan Carlos Ruiz-Rodriguez119, Joan Sabater-Riera141, Kai Saks276, Maria Salagianni310, Oliver Sanchez277, Adrián Sánchez-Montalvá278, Silvia Sánchez-Ramón279, Laire Schidlowski280, Agatha Schluter252, Julien Schmidt281, Matthieu Schmidt282, Catharina Schuetz283, Cyril E. Schweitzer284, Francesco Scolari285, Anna Sediva286, Luis Seijo287, Analia Gisela Seminario42, Damien Sene23, Piseth Seng221, Sevtap Senoglu167, Mikko Seppänen288, Alex Serra Llovich289, Mohammad Shahrooei97, Anna Shcherbina290, Virginie Siguret291, Eleni Siouti310, David M. Smadja293, Nikaia Smith78, Ali Sobh294, Xavier Solanich25, Jordi Solé-Violán295, Catherine Soler296, Pere Soler-Palacín297, Betül Sözeri86, Giulia Maria Stella2, Yuriy Stepanovskiy298, Annabelle Stoclin299, Fabio Taccone219, Yacine Tandjaoui-Lambiotte300, Jean-Luc Taupin301, Simon J. Tavernier302, Loreto Vidaur112, Benjamin Terrier303, Guillaume Thiery304, Christian Thorball260, Karolina Thorn305, Caroline Thumerelle158, Imran Tipu306, Martin Tolstrup307, Gabriele Tomasoni308, Julie Toubiana77, Josep Trenado Alvarez309, Sophie Trouillet-Assant311, Jesús Troya312, Owen T. Y. Tsang313, Liina Tserel314, Eugene Y. K. Tso315, Alessandra Tucci316, Şadiye Kübra Tüter Öz15, Matilde Valeria Ursini125, Takanori Utsumi225, Yurdagul Uzunhan317, Pierre Vabres318, Juan Valencia-Ramos319, Ana Maria Van Den Rym127, Isabelle Vandernoot320, Valentina Velez-Santamaria321, Silvia Patricia Zuniga Veliz134, Mateus C. Vidigal322, Sébastien Viel253, Cédric Villain323, Marie E. Vilaire-Meunier223, Judit Villar-García324, Audrey Vincent57, Guillaume Vogt325, Guillaume Voiriot326, Alla Volokha327, Fanny Vuotto158, Els Wauters328, Joost Wauters329, Alan K. L. Wu330, Tak-Chiu Wu331, Aysun Yahşi332, Osman Yesilbas333, Mehmet Yildiz168, Barnaby E. Young187, Ufuk Yükselmiş334, Mayana Zatz63, Stefano Ghirardello3, Valentina Zuccaro62, Ana de Andrés335, Jens Van Praet336, Bart N. Lambrecht337, Eva Van Braeckel337, Cédric Bosteels337, Levi Hoste338, Eric Hoste339, Fré Bauters337, Jozefien De Clercq337, Cathérine Heijmans340, Hans Slabbynck341, Leslie Naesens342, Benoit Florkin343, Cécile Boulanger344, Dimitri Vanderlinden345

1Germans Trias i Pujol University Hospital and Research Institute, Badalona, Barcelona, Spain. 2Respiratory Diseases Division, IRCCS Policlinico San Matteo Foundation, University of Pavia, Pavia, Italy. 3Neonatal Intensive Care Unit, Fondazione IRCCS Policlinico San Matteo, Pavia, Italy. 4Navarra Health Service Hospital, Pamplona, Spain. 5Jeffrey Modell Diagnostic and Research Center for Primary Immunodeficiencies, Barcelona, Catalonia, Spain; Immunology Division, Genetics Department, Vall d’Hebron University Hospital (HUVH), Vall d’Hebron Research Institute (VHIR), Vall d’Hebron Barcelona Hospital Campus, Universitat Autònoma de Barcelona (UAB), Barcelona, Catalonia, Spain. 6Immunohematology Unit, San Raffaele Hospital, Milan, Italy. 7Ondokuz Mayıs University Medical Faculty Pediatrics, Samsun, Turkey. 8Department of Infectious Diseases, Loghman Hakim Hospital, Shahid Beheshti University of Medical Sciences, Tehran, Iran. 9Hospital Regional de Huehuetenango, “Dr. Jorge Vides de Molina,” Guatemala. 10Hospital Nacional Edgardo Rebagliati Martins, Lima, Peru. 11Parc Sanitari Sant Joan de Déu, Sant Boi de Llobregat Spain. 12Khyber Medical University, Khyber Pakhtunkhwa, Pakistan. 13Anesthesia and Intensive Care, Rianimazione I, Fondazione IRCCS Policlinico San Matteo, Pavia, Italy. 14Virology Research Center, National Research Institute of Tuberculosis and lung diseases, Shahid Beheshti University of Medical Sciences, Tehran, Iran. 15Department of Pediatrics, Division of Pediatric Infectious Diseases, Selcuk University Faculty of Medicine, Konya, Turkey. 16College of Medicine, Imam Abdulrahman Bin Faisal University, Dammam, Saudi Arabia; Department of Pediatrics, King Fahad Hospital of the University, Al-Khobar, Saudi Arabia. 17Intensive care unit, Hôpital Européen, Marseille, France. 18Immunology Department, Hospital 12 de Octubre, Research Institute imas12, Complutense University, Madrid, Spain. 19Immunology Department, Asturias Central University Hospital, Biosanitary Research Institute of the Principality of Asturias (ISPA), Oviedo, Spain. 20Emergency and Critical Care Medicine Departments, College of Medicine, Imam AbdulRahman Ben Faisal University, Dammam, Saudi Arabia. 21Clinical Immunology and Primary Immunodeficiencias Unit, Hospital Sant Joan de Déu, Institut de Recerca Sant Joan de Déu, Barcelona; Universitat de Barcelona, Barcelona, Spain. 22Department of Biological Immunology, Necker Hospital for Sick Children, APHP and INEM, Paris, France. 23Internal medicine department, Hôpital Lariboisière, APHP; Université de Paris, Paris, France. 24Internal medicine department, Pitié-Salpétrière Hospital, Paris, France. 25Department of Internal Medicine, Hospital Universitari de Bellvitge, IDIBELL, Barcelona, Spain. 26Service de Médecine Intensive Réanimation, Hôpitaux Universitaires Henri Mondor, Assistance Publique - Hôpitaux de Paris (AP-HP); Groupe de Recherche Clinique CARMAS, Faculté de Santé de Créteil, Université Paris Est Créteil, Créteil, France. 27INSERM U1163, University of Paris, Imagine Institute, Paris, France & Pediatric Neurology Department, Necker-Enfants malades Hospital, APHP, Paris, France. 28Hospital U. de Tarragona Joan XXIII. Universitat Rovira i Virgili (URV). IISPV, Tarragona, Spain. 29Department of Propedeutics of Pediatrics and Medical Genetics, Danylo Halytsky Lviv National Medical University, Lviv, Ukraine. 30Department of Immunology and Allergy, Konya City Hospital, Konya, Turkey. 31Private practice, Paris, France. 32INSERM U1109, University of Strasbourg, Strasbourg, France. 33Necker Hospital for Sick Children, AP-HP, Paris, France. 34Molecular Virology Unit, Microbiology and Virology Department, Fondazione IRCCS Policlinico San Matteo and Department of Clinical, Surgical, Diagnostic and Pediatric Sciences, University of Pavia, Pavia, Italy. 35Department of Infectious Diseases, CHU de Caen, Caen, France. 36Consorcio Hospital General Universitario, Valencia, Spain. 37The Genetics Institute, Tel Aviv Sourasky Medical Center and Sackler Faculty of Medicine, Tel Aviv University, Tel Aviv, Israel. 38Department Urology, Nephrology, Transplantation, APHP-SU, Sorbonne Université, INSERM U 1082, Paris, France. 40Yildirim Beyazit University, Faculty of Medicine, Ankara City Hospital, Children’s Hospital, Ankara, Turkey. 41University of Lyon, CIRI, INSERM U1111, National referee centre RAISE, Pediatric Rheumatology, HFME, Hospices Civils de Lyon, Lyon, France. 42Center for Clinical Immunology, CABA, Buenos Aires, Argentina. 43Cruces University Hospital, Bizkaia, Spain. 44Paediatric Immunology and Vaccinology Unit, Geneva University Hospitals and Faculty of Medicine, Geneva, Switzerland. 45University Hospital and Research Institute “Germans Trias i Pujol,” Badalona, Spain. 46Hematology, Georges Pompidou Hospital, APHP, Paris, France. 47Pediatric Infectious Diseases Unit, Instituto de Investigación Hospital 12 de Octubre (imas12), Hospital Universitario 12 de Octubre, Universidad Complutense, Madrid, Spain. 48Infectious disease Unit, Pitié-Salpêtrière Hospital, AP-AP, Paris, France. 49Department of Pediatrics, 1st Faculty of Medicine, Charles University and Thomayer University Hospital, Prague, Czech Republic; Department of Immunology, Motol University Hospital, 2nd Faculty of Medicine, Charles University, Prague, Czech Republic. 50Centro de Investigación Biomédica en Red de Enfermedades Hepàticas y Digestivas (Ciberehd). Hospital de Mataró, Consorci Sanitari del Maresme, Mataró, Spain. 51Shupyk National Healthcare University of Ukraine, Kyiv, Ukraine. 52Service de Pneumologie, Hopital Bichat, APHP, Paris, France. 53Department of infectious diseases, CIC1408, GIMAP CIRI INSERM U1111, University Hospital of Saint-Étienne, Saint-Étienne, France. 54Clinical immunology unit, pediatric infectious disease departement, Faculty of Medicine and Pharmacy, Averroes University Hospital. LICIA Laboratoire d’immunologie clinique, d’inflammation et d’allergie, Hassann Ii University., Casablanca, Morocco. 55Bégin Military Hospital, Saint-Mandé, France. 56Sorbonne Université, INSERM, Institut Pierre Louis d’Epidémiologie et de Santé Publique (iPLESP), AP-HP, Hôpital Pitié Salpêtrière, Service de Virologie, Paris, France. 57Endocrinology unit, APHP Hôpitaux Universitaires Paris-Sud, Le Kremlin-Bicêtre, France. 58Department of Children’s Diseases and Pediatric Surgery, I. Horbachevsky Ternopil National Medical University, Ternopil, Ukraine. 59Pneumology Unit, Tenon Hospital, AP-HP, Paris, France. 60Department of Respiratory Diseases, Hospital Clínico y Universitario de Valencia, Valencia, Spain. 61Intensive care unit, Réseau Hospitalier Neuchâtelois, Neuchâtel, Switzerland. 62Infectious Diseases Unit, Fondazione IRCCS Policlinico San Matteo, Pavia, Italy. 63Human Genome and Stem Cell Research Center, University of São Paulo, São Paulo, Brazil. 64Department of Internal Medicine, College of Medicine, Imam Abdulrahman Bin Faisal University, Dammam, Saudi Arabia. 65Hospital Insular, Las Palmas de Gran Canaria, Spain. 66MS Center, Spedali Civili, Brescia, Italy. 67Laboratoire d’ImmunoRhumatologie Moléculaire, plateforme GENOMAX, INSERM UMR_S 1109, Faculté de Médecine, ITI TRANSPLANTEX NG, Université de Strasbourg, Strasbourg, France. 68Fondazione IRCCS Ca’ Granda Ospedale Maggiore Policlinico, Milan, Italy. 69Neuromuscular Unit, Neurology Department, Hospital Universitari de Bellvitge, IDIBELL and CIBERER, Barcelona, Spain. 70Hopital Robert Debré, Paris, France. 71Pediatric Immuno-Hematology Unit, Necker Enfants Malades Hospital, AP-HP, Paris, France. 72Department of Infectious and Tropical Diseases, University of Brescia, ASST Spedali Civili di Brescia, Brescia, Italy. 73Doctoral Health Care Center, Canarian Health System, Las Palmas de Gran Canaria, Spain. 74Hôpital Foch, Suresnes, France. 75Selcuk University Faculty of Medicine, Department of Anesthesiology and Reanimation, Intensive Care Medicine Unit, Konya, Turkey. 76Division of Clinical Pharmacology and Toxicology, Institute of Pharmacological Sciences of Southern Switzerland, Ente Ospedaliero Cantonale and Faculty of Biomedical Sciences, Università della Svizzera italiana, Lugano, Switzerland. 77Necker Hospital for Sick Children, Paris University, AP-HP, Paris, France. 78Pasteur Institute, Paris, France. 79McGill University Health Centre, Montreal, Canada. 80University Hospital and Research Institute Germans Trias i Pujol, IrsiCaixa AIDS Research Institute, UVic-UCC, Badalona, Spain. 81Clinical Biochemistry, Pathology, Paediatric Neurology and Molecular Medicine Departments and Biobank, Institut de Recerca Sant Joan de Déu and CIBERER-ISCIII, Esplugues, Spain. 82AP-HP, Avicenne Hospital, Intensive Care Unit, Bobigny, France; University Sorbonne Paris Nord, Bobigny, France; INSERM, U942, F-75010, Paris, France. 83Hospital Universitari Vall d’Hebron, Barcelona, Spain. 84Pitié-Salpêtrière Hospital, Paris, France. 85Service de médecine Intensive Réanimation, Groupe Hospitalier Pitié-Salpêtrière, Sorbonne Université, France. 86Umraniye Training and Research Hospital, Istanbul, Turkey. 87Faculty of Medical Sciences at University “Goce Delcev”, Shtip, North Macedonia. 88Department of Biochemistry, College of Medicine, Imam Abdulrahman Bin Faisal University, Dammam, Saudi Arabia. 89Fundació Docencia i Recerca Mutua Terrassa, Barcelona, Spain. 90Maladies Infectieuses et Tropicales, Nouvel Hôpital Civil, CHU Strasbourg, Strasbourg, France. 91UNSW Medicine, St Vincent’s Clinical School; Department of Thoracic Medicine, St Vincent’s Hospital Darlinghurst, Sydney, Australia. 92Intensive Care Unit, Montreuil Hospital, Montreuil, France. 93CHU Saint-Pierre, Université Libre de Bruxelles (ULB), Brussels, Belgium. 94Pediatric Intensive Care Unit, Robert-Debré University Hospital, APHP, Paris, France. 95General Internal Medicine, University Hospitals Leuven, Belgium. 96Hôpital Jean Verdier, APHP, Bondy, France. 97Specialized Immunology Laboratory of Dr. Shahrooei, Sina Medical Complex, Ahvaz, Iran. 98Centre de génétique humaine, CHU Besançon, Besançon, France. 99Sorbonne Université Médecine and APHP Sorbonne Université site Pitié-Salpêtrière, Paris, France. 100Pediatric Neurology Department, Necker-Enfants Malades Hospital, APHP, Paris, France. 101Department of Internal Medicine, Fondazione IRCCS Policlinico San Matteo, University of Pavia, Pavia, Italy. 102Intensive Care Unit, Georges Pompidou Hospital, APHP, Paris, France. 103Department of Pneumology, AZ Delta, Roeselare, Belgium. 104Molecular Diagnostic Unit, Fundación Rioja Salud, Logroño, La Rioja, Spain. 105Bégin Military Hospital, Saint-Mandé, France. 106Department of Pediatrics, Institute of Clinical Sciences, Sahlgrenska Academy, University of Gothenburg, Gothenburg, Sweden; Department of Rheumatology and Inflammation Research, Institute of Medicine, Sahlgrenska Academy, University of Gothenburg, Gothenburg, Sweden. 107Bursa City Hospital, Bursa, Turkey. 108Department of Medical Biochemistry and Molecular Biology, Faculty of Medicine, Mansoura University, Mansoura, Egypt. 109Tokyo Medical and Dental University, Tokyo, Japan. 110Ondokuz Mayıs University Faculty of Medicine, Samsun, Turkey. 111Necmettin Erbakan University, Meram Medical Faculty, Division of Pediatric Allergy and Immunology, Konya, Turkey. 112Intensive Care Medicine, Donostia University Hospital, Biodonostia Institute of Donostia, CIBER Enfermedades Respiratorias ISCIII, Donostia, Spain. 113Internal Medicine, University Hospital Edouard Herriot, Hospices Civils de Lyon, Lyon, France. 114Centre de Génétique, CHU Dijon, Dijon, France. 115Robert Debré Hospital, Paris, France. 116APHP Tenon Hospital, Paris, France. 117Sorbonne Universités, UPMC University of Paris, Paris, France. 118Department of Clinical Immunology, Hospital Clínico San Carlos, Madrid, Spain. 119Intensive Care Department, HUVH, Vall d’Hebron Barcelona Hospital Campus, Barcelona, Catalonia, Spain; Shock, Organ Dysfunction and Resuscitation Research Group, Vall d’Hebron Research Institute (VHIR), Vall d’Hebron Barcelona Hospital Campus, Barcelona, Catalonia, Spain. 120Intensive Care Unit, Hospital Clínico y Universitario de Valencia, Valencia, Spain. 121Genomics Division, Instituto Tecnológico y de Energías Renovables (ITER), Santa Cruz de Tenerife, Spain; CIBER de Enfermedades Respiratorias, Instituto de Salud Carlos III, Madrid, Spain; Research Unit, Hospital Universitario N.S. de Candelaria, Santa Cruz de Tenerife, Spain; Instituto de Tecnologías Biomédicas (ITB), Universidad de La Laguna, San Cristóbal de La Laguna, Spain, Santa Cruz de Tenerife, Spain. 122CHU Limoges and INSERM CIC 1435 and UMR 1092, Limoges, France. 123Infectious Diseases Unit, Department of Pediatrics, Hospital Sant Joan de Déu, Barcelona, Spain; Institut de Recerca Sant Joan de Déu, Spain; Universitat de Barcelona (UB), Barcelona, Spain. 124Department of Pathology, United Christian Hospital, Hong Kong. 125Institute of Genetics and Biophysics “Adriano Buzzati-Traverso,” IGB-CNR, Naples, Italy. 126Department of Pediatrics, Children’s Hospital Zagreb, University of Zagreb School of Medicine, Zagreb, Josip Juraj Strossmayer University of Osijek, Medical Faculty Osijek, Osijek, Croatia. 127Laboratory of Immunogenetics of Human Diseases, IdiPAZ Institute for Health Research, La Paz Hospital, Madrid, Spain. 128Hematology, APHP, Hopital Européen Georges Pompidou and INSERM UMR-S1140, Paris, France. 129Faculty of Medicine, Department of Pediatrics, Division of Pediatric Infectious Diseases, Karadeniz Technical University, Trabzon, Turkey. 130Division of Immunology, Hospital General Universitario and Instituto de Investigación Sanitaria “Gregorio Marañón”, Madrid, Spain. 131Bégin military Hospital, Saint-Mandé, France. 132Aix-Marseille University, IRD, AP-HM, SSA, VITROME, IHU Méditerranée Infection, Marseille, France, French Armed Forces Center for Epidemiology and Public Health (CESPA), Marseille, France. 133Pediatric Intensive Care Unit, Hospital Sant Joan de Déu, Barcelona, Spain. 134Gestión Integral en Salud, San José Pinula, Guatemala. 135Department of Internal Medicine, Hôpital Erasme, Université Libre de Bruxelles, Brussels, Belgium. 136Immunodeficiencies Unit, Research Institute Hospital, Madrid, Spain. 137Primary Immunodeficiencies Unit, Pediatrics, University Hospital 12 octubre, Madrid, Spain; School of Medicine Complutense University of Madrid, Madrid, Spain. 138Genomics Division, Instituto Tecnológico y de Energías Renovables (ITER), Santa Cruz de Tenerife, Spain. 139Assistance Publique Hôpitaux de Paris, Paris, France. 140Ankara City Hospital, Ankara, Turkey. 141Department of Intensive Care, Hospital Universitari de Bellvitge, IDIBELL, Barcelona, Spain. 142Immunodeficiency Outpatient Clinic, Institute for Medical Immunology, FOCIS Center of Excellence, Charité Universitätsmedizin Berlin, Germany. 143Surgical Intensive Care Unit, University Hospitals Leuven, Leuven, Belgium. 144CNAG-CRG, Barcelona Institute of Science and Technology, Barcelona, Spain. 145Department of Internal Medicine, National Reference Center for Rare Systemic Autoimmune Diseases, AP-HP, APHP-CUP, Hôpital Cochin, Paris, France. 146Department of Paediatric Immunology and Pulmonology, Center for Primary Immunodeficiency Ghent, Jeffrey Modell Diagnosis and Research Center, PID Research Lab, Ghent University Hospital, Ghent, Belgium. 147Sharjah Institute of Medical Research, College of Medicine, University of Sharjah, Sharjah, UAE, Sharjah, UAE. 148Department of Biosciences and Nutrition, SE14183, Huddinge, Karolinska Institutet, Stockholm, Sweden. 149Department of Pediatrics (Infectious Diseases), Istanbul Faculty of Medicine, Istanbul University, Istanbul, Turkey. 150I. Horbachevsky Ternopil National Medical University, Ternopil, Ukraine. 151Pediatric Infectious Diseases Unit, Bakirkoy Dr. Sadi Konuk Training and Research Hospital, University of Health Sciences, Istanbul, Turkey. 152Health Sciences University, Darıca Farabi Education and Research Hospital, Kocaeli, Turkey. 153Department of Immunology, Hospital Universitario de Gran Canaria Dr. Negrín, Canarian Health System, Las Palmas de Gran Canaria, Spain. 154Department of Paediatrics, Queen Elizabeth Hospital, Hong Kong. 155IntensivenCare Unit, Marqués de Valdecilla Hospital, Santander, Spain. 156Hospital del Mar, Institut Hospital del Mar d’Investigacions Mèdiques (IMIM), UAB, UPF, Barcelona. 157Intensive care unit, APHM, Marseille, France. 158 CHU Lille, unité de pneumologie et allergologie pédiatriques, Lille, France. 159Department of Medicine, The University of Hong Kong, Hong Kong. 160Department of Pediatrics, Columbia University, New York, NY, USA. 161Centre hospitalier intercommunal Poissy Saint Germain en Laye, Poissy, France. 162IHU Méditerranée Infection, Service de l’Information Médicale, Hôpital de la Timone, Marseille, France. 163Health Science University Ankara City Hospital, Ankara, Turkey. 164School of Medicine, General Surgery Department Fevzi Çakmak Mah, Marmara University, Istanbul, Turkey. 165Mersin City Education and Research Hospital, Mersin, Turkey. 166Division of Pediatric Infectious Diseases, Prof. Dr. Cemil Tascıoglu City Hospital, Istanbul, Turkey. 167Departments of Infectious Diseases and Clinical Microbiology, Bakirkoy Dr. Sadi Konuk Training and Research Hospital, University of Health Sciences, Istanbul, Turkey. 168Department of Pediatric Rheumatology, Istanbul University-Cerrahpasa, Istanbul, Turkey. 169Department of Pediatrics, Tokyo Medical and Dental University, Tokyo, Japan. 170Health Sciences University, Umraniye Education and Research Hospital, Istanbul, Turkey. 171Department of Parasitology and Research Center for Infectious Disease Sciences, Graduate School of Medicine, Osaka City University, Osaka, Japan. 172Pediatric Infectious Diseases Unit of Osman Gazi University Medical School in Eskişehir, Turkey. 173Meram Medical Faculty, Necmettin Erbakan University, Konya, Turkey. 174Department of Immunology, 2nd Faculty of Medicine, Charles University and University Hospital in Motol, Prague, Czech Republic. 175 National and Kapodistrian University of Athens, Medical School and “Sotiria” General Hospital of Chest Diseases, Athens, Greece. 176Central Clinical Hospital of the Ministry of Interior and Administration, Warsaw, Poland. 177Clinique des soins intensifs, HFR Fribourg, Fribourg, Switzerland. 178Oncobiologie Génétique Bioinformatique, PC Bio, CHU Besançon, Besançon, France. 179Department of Intensive Care, Tuen Mun Hospital, Hong Kong. 180Paediatric Infectious Disease Unit, Hospital Authority Infectious Disease Center, Princess Margaret Hospital, Hong Kong (Special Administrative Region), China. 181Department of Pathology, Queen Mary Hospital, Hong Kong. 182Aix-Marseille Univ, IRD, MEPHI, IHU Méditerranée Infection, Marseille, France. 183Department of Paediatrics, Tuen Mun Hospital, Hong Kong. 184Pediatric Unit, IRCCS Azienda Ospedaliero-Universitaria di Bologna, Bologna, Italy.185Necker hospital, Paris, France. 186Department of Paediatrics and Adolescent Medicine, The University of Hong Kong, Hong Kong, China. 187National Centre for Infectious Diseases, Singapore. 188Hospital Universitario Reina Sofía, Cordoba, Spain. 189Imperial College, London, England. 190Hospital General San Juan de Dios, Ciudad de Guatemala, Guatemala. 191Endocrinology and Diabetes for Children, AP-HP, Bicêtre Paris-Saclay Hospital, Le Kremlin-Bicêtre, France. 192Innate Immunity group, IdiPAZ Institute for Health Research, La Paz Hospital, Madrid, Spain. 193Neurology unit, APHP Pitié-Salpêtrière Hospital, Paris University, Paris, France. 194Department of Medicine, Pamela Youde Nethersole Eastern Hospital, Hong Kong. 195Intensive care unit, APHP Pitié-Salpêtrière Hospital, Paris University, Paris, France. 196National Centre for Infectious Diseases; Tan Tock Seng Hospital; Yong Loo Lin School of Medicine; Lee Kong Chian School of Medicine, Singapore. 197Hospital de Niños Dr. Ricardo Gutierrez, Buenos Aires, Argentina. 198Department of Clinical Immunology and Infectious Diseases, National Research Institute of Tuberculosis and Lung Diseases, Shahid Beheshti University of Medical Sciences, Tehran, Iran. 199Neurooncology and Neuroinflammation Unit, IRCCS Mondino Foundation, Pavia, Italy. 200Clinical Tuberculosis and Epidemiology Research Center, National Research Institute of Tuberculosis and Lung Diseases (NRITLD), Shahid Beheshti University of Medical Sciences, Tehran, Iran. 201Coordenadora da Unidade de Infeciologia e Imunodeficiências do Serviço de Pediatria, Centro Materno-Infantil do Norte, Porto, Portugal. 202Hospital Sant Joan de Déu and University of Barcelona, Barcelona, Spain. 203Pediatric Infectious Diseases and Immunodeficiencies Unit, Hospital Universitari Vall d’Hebron, VHIR, Vall d’Hebron Barcelona Hospital Campus, Universitat Autònoma de Barcelona (UAB), Barcelona, Catalonia, Spain. 204Hospital Universitari Mutua de Terrassa, Universitat de Barcelona, Barcelona, Spain. 205IrsiCaixa AIDS Research Institute, ICREA, UVic-UCC, Research Institute Germans Trias i Pujol, Badalona, Spain. 206Department of Laboratory, Cruces University Hospital, Barakaldo, Bizkaia, Spain, Bizkaia, Spain. 207Intensive Care Unit, Hospital General Universitario Gregorio Marañón, Madrid, Spain. 208Department of Infectious Diseases, Kirby Institute, UNSW Sydney, Sydney, NSW 2052, Australia; St Vincent’s Hospital Sydney, Darlinghurst, NSW, Australia. 209APHP Pitié-Salpêtrière Hospital, Paris, France. 210Department of Pediatrics, Complejo Hospitalario Universitario Insular-Materno Infantil, Canarian Health System, Las Palmas de Gran Canaria, Spain. 211Medical Intensive Care Unit, University Hospitals Leuven, Leuven, Belgium. 212Aix-Marseille University, APHM, Marseille, France. 213Service de Médecine Intensive Réanimation, Hôpitaux Universitaires Henri Mondor, AP-HP. Groupe de Recherche Clinique CARMAS, Faculté de Santé de Créteil, Université Paris Est Créteil, France. 214APHP Cohin Hospital, Paris, France. 215Department of Critical Care Medicine, Ente Ospedaliero Cantonale, Bellinzona, Switzerland. 216Necmettin Erbakan University, Meram Medical Faculty, Division of Pediatric Infectious Diseases, Konya, Turkey. 217Department of Pediatrics, University Hospitals Leuven; KU Leuven, Department of Microbiology, Immunology and Transplantation; Laboratory for Inborn Errors of Immunity, KU Leuven, Leuven, Belgium. 218Hospices Civils de Lyon, Hôpital de la Croix-Rousse, Lyon, France. 219Center of Human Genetics, Hôpital Erasme, Brussels, Belgium. 220Centre hospitalier de Gonesse, Gonesse, France. 221Aix-Marseille University, IRD, AP-HM, MEPHI, IHU Méditerranée Infection, Marseille, France. 222Vascular Medicine, Georges Pompidou Hospital, APHP, Paris, France. 223Institut Jérôme Lejeune, Paris, France. 224Division of Pulmonary and Critical Care, College of Medicine-Jacksonville, University of Florida, Jacksonville, FL, USA. 225Department of Pediatrics, Hiroshima University Graduate School of Biomedical and Health Sciences, Hiroshima, Japan. 226BC Children’s Hospital Research Institute, University of British Columbia, Vancouver, Canada. 227Médecine Intensive Réanimation, Hôpitaux Universitaires Henri Mondor, AP-HP, Créteil, France. 228Guanarteme Health Care Center, Canarian Health System, Las Palmas de Gran Canaria, Spain. 229Regional University Hospital of Malaga, Malaga, Spain. 230Department of Immunology, Hospital Universitari de Bellvitge, IDIBELL, Barcelona, Spain. 231Aix-Marseille University, INSERM, INRAE, C2VN, Marseille, France. 232Department of General Paediatrics, Hôpital Bicêtre, AP-HP, University of Paris-Saclay, Le Kremlin-Bicêtre, France. 233INSERM U1144, Université de Paris, DMU INVICTUS, APHP-Nord, Département de Médecine Interne, Lariboisière Hospital, Paris, France. 234CHU de La Timone, Marseille, France. 235Department of Epidemiology, Infectious Disease Control and Prevention, Graduate School of Biomedical and Health Sciences, Hiroshima University, Hiroshima, Japan. 236Pediatric Immunology and rhumatology Department, Necker Hospital, AP-HP, Paris, France. 237Centro Hospitalar Universitário de Lisboa Central, Lisbon, Portugal. 238Infectious Diseases Horizontal Technlogy Centre, A*STAR; Singapore Immunology Network, A*STAR, Singapore. 239Department of Medicine and Geriatrics, Tuen Mun Hospital, Hong Kong. 240Regional Universitary Hospital of Malaga, Málaga, Spain. 241Department of Immunology, Hospital Universitario Marqués de Valdecilla, Santander, Spain. 242Bilkent University, Department of Molecular Biology and Genetics, Ankara, Turkey. 244IHU Méditerranée Infection, Aix-Marseille Univ, IRD, AP-HM, SSA, VITROME, IHU Méditerranée Infection, Marseille, France. 245L’Hôpital Foch, Suresnes, France. 246Department of Immunology, CIC1408, GIMAP CIRI INSERM U1111, University Hospital of Saint-Étienne, Saint-Étienne, France. 247Department of Immunology, Hospital Universitario 12 de Octubre, Instituto de Investigación Sanitaria Hospital 12 de Octubre (imas12), Madrid, Spain. 248Instituto Nacional de Ciencias Médicas y Nutrición Salvador Zubirán, Mexico. 249Diabetes Research Institute, IRCCS San Raffaele Hospital, Milan, Italy. 250APHP Hôpitaux Universitaires Paris-Sud, Le Kremlin-Bicêtre, France. 251AP-HP, Avicenne Hospital, Intensive Care Unit, Bobigny, France; INSERM UMR-S 942, Cardiovascular Markers in Stress Conditions (MASCOT), University of Paris, Paris, France. 252Neurometabolic Diseases Laboratory, IDIBELL-Hospital Duran i Reynals, Barcelona; CIBERER U759, ISCiii Madrid, Spain. 253Hospices Civils de Lyon, Lyon, France. 254Univ. Lille, INSERM U1285, CHU Lille, Pôle de médecine intensive-réanimation, CNRS, UMR 8576-Unité de Glycobiologie Structurale et Fonctionnelle, Lille, France. 255Department of General pediatrics, Robert Debre Hospital, Paris, France. 256University of British Columbia, Vancouver, Canada. 257Jeffrey Modell Diagnostic and Research Center for Primary Immunodeficiencies, Barcelona, Catalonia, Spain, Diagnostic Immunology Research Group, VHIR, HUVH, Vall d’Hebron Barcelona Hospital Campus, Barcelona, Catalonia, Spain. 258AP-HP, Avicenne Hospital, Intensive Care Unit, Bobigny, France; University Sorbonne Paris Nord, Bobigny, France. 259Centre Hospitalier de Saint-Denis, Saint-Denis, France. 260Precision Medicine Unit, Lausanne University Hospital and University of Lausanne, Lausanne, Switzerland. 261Paris Cardiovascular Center, PARCC, INSERM, Université de Paris, Paris, France. 262Germans Trias i Pujol Hospital, Badalona, Spain. 263Medical intensive care unit. Hopital de la Croix-Rousse. Hospices Civils de Lyon, Lyon, France. 264Department of Clinical Laboratory, Hospital Universitari de Bellvitge, IDIBELL, Barcelona, Spain. 265Pediatric Infectious Diseases and Immunodeficiencies Unit, Hospital Universitari Vall d’Hebron, VHIR, Vall d’Hebron Barcelona Hospital Campus, Barcelona, Spain. 266Université de Paris, CNRS UMR-8601; Team Chemistry & Biology, Modeling & Immunology for Therapy, CBMIT, Paris, France. 267Germans Trias i Pujol University Hospital and Research Institute, Badalona, Badalona, Spain. 268Department of Immunology, University Hospital of Gran Canaria Dr. Negrín, Canarian Health System, Las Palmas de Gran Canaria, Spain; Department of Clinical Sciences, University Fernando Pessoa Canarias, Las Palmas de Gran Canaria, Spain. 269Neurometabolic Diseases Laboratory, Bellvitge Biomedical Research Institute (IDIBELL), 08908 L’Hospitalet de Llobregat; University Hospital Germans Trias i Pujol, Badalona, Barcelona, Catalonia, Spain. 270Consorcio Hospital General Universitario, Valencia, Spain. 271APHP Hôpitaux Universitaires Paris-Sud, Paris, France. 272Intensive Care Unit, Louis-Mourier Hospital, Colombes, France. 273Virology unit, Université de Paris, Cohin Hospital, APHP, Paris, France. 274Neurometabolic Diseases Laboratory and CIBERER U759, Barcelona, Spain. 275Hospital San Pedro, Logroño, Spain. 276University of Tartu, Institute of Biomedicine and Translational Medicine, Tartu, Estonia. 277Respiratory medicine, Georges Pompidou Hospital, APHP, Paris, France. 278Infectious Diseases Department, International Health Program of the Catalan Insitute of Health (PROSICS), HUVH, Vall d’Hebron Barcelona Hospital Campus, Universitat Autónoma de Barcelona, Barcelona, Spain. 279Hospital Clínico San Carlos and IdSSC, Madrid, Spain. 280Faculdades Pequeno Príncipe, Instituto de Pesquisa Pelé Pequeno Príncipe, Curitiba, Brazil. 281AP-HP, Avicenne Hospital, Intensive Care Unit, Bobigny, France. 282Service de Médecine Intensive Réanimation, Institut de Cardiologie, Hopital Pitié-Salpêtrière, Paris, France. 283Department of Pediatrics, Medizinische Fakultät Carl Gustav Carus, Technische Universität Dresden, Dresden, Germany. 284CHRU de Nancy, Hôpital d’Enfants, Vandoeuvre, France. 285Chair of Nephrology, University of Brescia, Brescia, Italy. 286Department of Immunology, 2nd Faculty of Medicine, Charles University and Motol University Hospital, Prague, Czech Republic. 287Clínica Universidad de Navarra and Ciberes, Madrid, Spain. 288HUS Helsinki University Hospital, Children and Adolescents, Rare Disease Center, and Inflammation Center, Adult Immunodeficiency Unit, Majakka, Helsinki, Finland. 289Fundació Docencia i Recerca Mutua Terrassa, Terrassa, Spain. 290D. Rogachev National Medical and Research Center of Pediatric Hematology, Oncology, Immunoogy, Moscow, Russia. 291Haematology Laboratory, Lariboisière Hospital, University of Paris, Paris, France. 293INSERM U1140, University of Paris, European Georges Pompidou Hospital, Paris, France. 294Department of Pediatrics, Faculty of Medicine, Mansoura University, Mansoura, Egypt. 295Intensive Care Medicine, Hospital Universitario de Gran Canaria Dr. Negrín, Canarian Health System, Las Palmas de Gran Canaria, Spain. 296CHU de Saint Etienne, Saint-Priest-en-Jarez, France. 297Pediatric Infectious Diseases and Immunodeficiencies Unit, Hospital Universitari Vall d’Hebron, VHIR, Vall d’Hebron Barcelona Hospital Campus, Universitat Autònoma de Barcelona (UAB), Barcelona, Catalonia, Spain, EU, Barcelona, Spain. 298Department of pediatric infectious diseases and pediatric immunology, Shupyk National Healthcare University of Ukraine, Kyiv, Ukraine. 299Gustave Roussy Cancer Campus, Villejuif, France. 300Intensive Care Unit, Avicenne Hospital, APHP, Bobigny, France. 301Laboratory of Immunology and Histocompatibility, Saint-Louis Hospital, Paris University, Paris, France. 302Center for Inflammation Research, Laboratory of Molecular Signal Transduction in Inflammation, VIB, Ghent, Belgium. 303Department of Internal Medicine, Université de Paris, INSERM, U970, PARCC, F-75015, Paris, France. 304Service de médecine intensive réanimation, CHU de Saint-Étienne, France. 305Department of Rheumatology and Inflammation Research, Institute of Medicine, Sahlgrenska Academy, University of Gothenburg, Gothenburg, Sweden. 306University of Management and Technology, Lahore, Pakistan. 307Department of Infectious Diseases, Aarhus University Hospital, Aarhus, Denmark. 308First Division of Anesthesiology and Critical Care Medicine, ASST Spedali Civili di Brescia, Brescia, Italy. 309Intensive Care Department, Hospital Universitari MutuaTerrassa, Universitat Barcelona, Terrassa, Spain. 310Laboratory of Immunobiology, Center for Clinical, Experimental Surgery and Translational Research, Biomedical Research Foundation of the Academy of Athens, Athens, Greece. 311International Center of Research in Infectiology, Lyon University, INSERM U1111, CNRS UMR 5308, ENS, UCBL, Lyon, France; Hospices Civils de Lyon, Lyon Sud Hospital, Pierre-Bénite, France. 312Infanta Leonor University Hospital, Madrid, Spain. 313Department of Medicine and Geriatrics, Princess Margaret Hospital, Hong Kong. 314University of Tartu, Institute of Clinical Medicine, Tartu, Estonia. 315Department of Medicine, United Christian Hospital, Hong Kong. 316Hematology Department, ASST Spedali Civili di Brescia, Brescia, Italy. 317Pneumologie, Hôpital Avicenne, APHP, INSERM U1272, Université Sorbonne Paris Nord, Bobigny, France. 318Dermatology unit, Laboratoire GAD, INSERM UMR1231 LNC, Université de Bourgogne, Dijon, France. 319University Hospital of Burgos, Burgos, Spain. 320Center of Human Genetics, Hôpital Erasme, Université Libre de Bruxelles, Brussels, Belgium. 321Bellvitge University Hospital, L’Hospitalet de Llobregat, Barcelona, Spain. 322University of São Paulo, São Paulo, Brazil. 323CHU de Caen, Caen, France. 324Hospital del Mar-IMIM Biomedical Research Institute, Barcelona, Catalonia, Spain. 325Neglected Human Genetics Laboratory, INSERM, University of Paris, Paris, France. 326Sorbonne Université, Service de Médecine Intensive Réanimation, Hôpital Tenon, AP-HP, Paris, France. 327Pediatric Infectious Disease and Pediatric Immunology Department, Shupyk National Healthcare University of Ukraine, Kyiv, Ukraine. 328Department of Pneumology, University Hospitals Leuven, Leuven, Belgium. 329Laboratory for Clinical Infectious and Inflammatory Disorders, Departement of Microbiology, Immunology and Transplantation, Leuven, Belgium. 330Department of Clinical Pathology, Pamela Youde Nethersole Eastern Hospital, Hong Kong. 331Department of Medicine, Queen Elizabeth Hospital, Hong Kong. 332Ankara City Hospital, Children’s Hospital, Ankara, Turkey. 333Division of Pediatric Infectious Disease, Department of Pediatrics, Faculty of Medicine, Karadeniz Technical University, Department of Pediatrics, Division of Pediatric Critical Care Medicine, Trabzon, Turkey. 334Health Sciences University, Lütfi Kırdar Kartal Education and Research Hospital, İstanbul, Turkey. 335Department of Immunology, Hospital Ramón y Cajal, Madrid, Spain. 336Department of Nephrology and Infectiology, AZ Sint-Jan, Bruges, Belgium. 337Department of Pulmonology, Ghent University Hospital, Belgium. 338Department of Pediatric Pulmonology and Immunology, Ghent University Hospital, Belgium. 339Department of Intensive Care Unit, Ghent University Hospital, Belgium. 340Department of Pediatric Hemato-Oncology, Jolimont Hospital; Department of Pediatric Hemato-Oncology, HUDERF, La Louvière, Belgium. 341Department of Pulmonology, ZNA Middelheim, Antwerp, Belgium. 342Department of Internal Medicine, Ghent University Hospital, Belgium. 343Department of Pediatric Immuno-Hémato-Rhumatology, CHR Citadelle, Liége, Belgium. 344Department of Pediatric Hemato-Oncology, UCL Louvain, Brussels, Belgium. 345Department of Pediatrics, Saint Luc, UCL Louvain, Brussels, Belgium.

**Members of the COVID-STORM Clinicians:** Giuseppe Foti1, Giacomo Bellani1, Giuseppe Citerio1, Ernesto Contro1, Alberto Pesci2, Maria Grazia Valsecchi3, Marina Cazzaniga4

1Department of Emergency, Anesthesia and Intensive Care, School of Medicine and Surgery, University of Milano-Bicocca, San Gerardo Hospital, Monza, Italy. 2Department of Pneumology, School of Medicine and Surgery, University of Milano-Bicocca, San Gerardo Hospital, Monza, Italy. 3Center of Bioinformatics, Biostatistics and Bioimaging, School of Medicine and Surgery, University of Milano-Bicocca, San Gerardo Hospital, Monza, Italy. 4Phase I Research Center, School of Medicine and Surgery, University of Milano-Bicocca, San Gerardo Hospital, Monza, Italy.

**Members of the NIAID Immune Response to COVID Group:** Jeffrey J. Danielson1, Kerry Dobbs1, Anuj Kashyap1, Li Ding1, Clifton L. Dalgard2, Alessandra Sottini3, Virginia Quaresima3, Eugenia Quiros-Roldan4, Camillo Rossi5, Laura Rachele Bettini6, Mariella D’Angio6, Ilaria Beretta7, Daniela Montagna8, Amelia Licari9, Gian Luigi Marseglia10

1Laboratory of Clinical Immunology and Microbiology, Division of Intramural Research, NIAID, NIH, Bethesda, MD, USA. 2Department of Anatomy, Physiology and Genetics, Uniformed Services University of the Health Sciences; The American Genome Center, Uniformed Services University of the Health Sciences, Bethesda, MD, USA. 3CREA Laboratory, Diagnostic Department, ASST Spedali Civili di Brescia, Brescia, Italy. 4Department of Infectious and Tropical Diseases, University of Brescia and ASST Spedali Civili di Brescia, Brescia, Italy. 5Chief Medical Officer, ASST Spedali Civili di Brescia, Brescia, Italy. 6Pediatric Departement and Centro Tettamanti-European Reference Network PaedCan, EuroBloodNet, MetabERN-University of Milano-Bicocca-Fondazione MBBM-Ospedale, San Gerardo, Monza, Italy. 7Department of Infectious Diseases, University of Milano-Bicocca, San Gerardo Hospital, Monza, Italy. 8Laboratory of Immunology and Transplantation, Fondazione IRCCS Policlinico San Matteo, Pavia, Italy; Department of Clinical, Surgical, Diagnostic and Pediatric Sciences, University of Pavia, Pavia, Italy. 9Department of Pediatrics, Fondazione IRCCS Policlinico San Matteo, University of Pavia, Pavia, Italy. 10Department of Pediatrics, Fondazione IRCCS Policlinico San Matteo and Department of Clinical, Surgical, Diagnostic and Pediatric Sciences, University of Pavia, Pavia, Italy.

**Members of the NH-COVAIR Study Group:** Isabella Batten1, Conor Reddy1, Matt McElheron1, Claire Noonan1, Emma Connolly1, Aoife Fallon1

1Department of Age-Related Healthcare, Tallaght University Hospital and Department of Medical Gerontology, School of Medicine, Trinity College Dublin.

**Members of the Danish CHGE:** Merete Storgaard1, Sofie Jørgensen1, Martin Tolstrup1

1Department of Infectious Diseases, Aarhus University Hospital, Aarhus, Denmark.

**Members of the The Danish Blood Donor Study (DBDS):** Christian Erikstrup1, Ole Birger Pedersen2, Erik Sørensen3, Susan Mikkelsen1, Khoa Manh Dinh1, Margit Anita Hørup Larsen3, Isabella Worlewenut Paulsen2, Jakob Hjorth Von Stemann3, Morten Bagge Hansen3, Sisse Rye Ostrowski3

1Department of Clinical Immunology, Aarhus University Hospital, Aarhus, Denmark. 2Department of Clinical Immunology, Zeeland University Hospital, Køge, Denmark. 3Department of Clinical Immunology, Rigshospitalet, Copenhagen University Hospital, Copenhagen, Denmark.

**Members of the St James’s Hospital, SARS CoV2 Interest group:** Liam Townsend1, Cliona Ni Cheallaigh1, Colm Bergin1, Ignacio Martin-Loeches2, Jean Dunne3, Niall Conlon3, Nollaig Bourke4, Cliona O’Farrelly5

1Department of Infectious Diseases, St James’s Hospital; Department of Clinical Medicine, School of Medicine, Trinity Translational Medicine Institute, Trinity College Dublin, Dublin, Ireland. 2Department of Intensive Care Medicine, St James’s Hospital, Dublin, Ireland. 3Department of Immunology, St James’s Hospital; Department of Immunology, School of Medicine, Trinity College Dublin, Ireland. 4Department of Medical Gerontology, School of Medicine, Trinity Translational Medicine Institute, Trinity College Dublin, Dublin, Ireland. 5School of Biochemistry and Immunology, Trinity Biomedical Sciences Institute, Trinity College Dublin; School of Medicine, Trinity College Dublin, Dublin, Ireland.

**Members of the French COVID Cohort Study Group:** Laurent Abel1, Clotilde Allavena2, Claire Andrejak3, François Angoulvant4, Cecile Azoulay5, Delphine Bachelet6, Marie Bartoli7, Romain Basmaci8, Sylvie Behillill9, Marine Beluze10, Nicolas Benech11, Dehbia Benkerrou12, Krishna Bhavsar6, Laurent Bitker11, Lila Bouadma6, Maude Bouscambert-Duchamp13, Pauline Caraux Paz14, Minerva Cervantes-Gonzalez6, Anissa Chair6, Catherine Chirouze15, Alexandra Coelho16, Hugues Cordel17, Camille Couffignal6, Sandrine Couffin-Cadiergues18, Eric d’Ortenzio7, Etienne De Montmollin6, Alexa Debard19, Marie-Pierre Debray6, Dominique Deplanque20, Diane Descamps6, Mathilde Desvallée21, Alpha Diallo7, Jean-Luc Diehl22, Alphonsine Diouf16, Céline Dorival12, François Dubos23, Xavier Duval6, Philippine Eloy6, Vincent Enouf9, Olivier Epaulard24, Hélène Esperou18, Marina Esposito-Farase6, Manuel Etienne25, Denis Garot26, Nathalie Gault6, Alexandre Gaymard13, Jade Ghosn6, Tristan Gigante27, Morgane Gilg27, François Goehringer28, Jérémie Guedj29, Alexandre Hoctin16, Isabelle Hoffmann6, Ikram Houas18, Jean-Sébastien Hulot22, Salma Jaafoura18, Ouifiya Kafif6, Florentia Kaguelidou30, Sabrina Kali6, Younes Kerroumi31, Antoine Khalil6, Coralie Khan21, Antoine Kimmoun32, Fabrice Laine33, Cédric Laouénan6, Samira Laribi6, Minh Le6, Cyril Le Bris34, Sylvie Le Gac6, Quentin Le Hingrat6, Soizic Le Mestre7, Hervé Le Nagard35, Adrien Lemaignen26, Véronique Lemee25, François-Xavier Lescure6, Sophie Letrou6, Yves Levy6, Bruno Lina13, Guillaume Lingas35, Jean Christophe Lucet6, Moïse Machado37, Denis Malvy38, Marina Mambert16, Aldric Manuel39, France Mentré6, Amina Meziane12, Hugo Mouquet9, Jimmy Mullaert6, Nadège Neant35, Duc Nguyen38, Marion Noret40, Aurélie Papadopoulos18, Christelle Paul7, Nathan Peiffer-Smadja6, Vincent Peigne41, Ventzislava Petrov-Sanchez7, Gilles Peytavin6, Huong Pham6, Olivier Picone8, Valentine Piquard6, Julien Poissy23, Oriane Puéchal42, Manuel Rosa-Calatrava13, Bénédicte Rossignol27, Patrick Rossignol28, Carine Roy6, Marion Schneider6, Richa Su6, Coralie Tardivon6, Marie-Capucine Tellier6, François Téoulé12, Olivier Terrier13, Jean-François Timsit6, Christelle Tual43, Sarah Tubiana6, Sylvie Van Der Werf9, Noémie Vanel44, Aurélie Veislinger43, Benoit Visseaux6, Aurélie Wiedemann45, Yazdan Yazdanpanah6

1INSERM UMR 1163, Paris, France. 2CHU Nantes, France. 3CHU Amiens, France. 4Hôpital Necker, Paris, France. 5Hopitâl Cochin, Paris, France. 6Hôpital Bichat, Paris, France. 7ANRS, Paris, France. 8Hôpital Louis Mourier, Colombes, France. 9Pasteur Institute, Paris, France. 10F-CRIN Partners Platform, Paris, France. 11CHU Lyon, France. 12INSERM UMR 1136, Paris, France. 13INSERM UMR 1111, Lyon, France. 14CH Villeneuve Saint Georges, France. 15CHRU Jean Minjoz, Besançon, France. 16INSERM UMR 1018, Paris, France. 17Hôpital Avicenne, Bobigny, France. 18INSERM Pôle Recherche Clinique, Paris, France. 19CHU Toulouse, France. 20Hôpital Calmette, Lille, France. 21INSERM UMR 1219, Bordeaux, France. 22Hôpital Européen Georges Pompidou, Paris, France. 23CHU Lille, France. 24CHU Grenoble, France. 25CHU Rouen, France. 26CHU Tours, France. 27F-CRIN INI-CRCT, Nancy, France. 28CHU Nancy, France. 29Université de Paris, INSERM, IAME, F-75018 Paris, France. 30Hôpital Robert Debré, Paris, France. 31GH Diaconesses, Paris, France. 32Université de Lorraine, CHRU de Nancy, Service de Médecine Intensive et Réanimation Brabois, INSERM U116, Nancy, France. 33CHU Rennes, France. 34CH Beziers, France. 35INSERM UMR 1137, Paris, France. 36Vaccine Research Insitute (VRI), INSERM U955, Créteil, France. 37Grand Hôpital de l’Est Francilien, Marne-la-Vallée, France. 38CHU Bordeaux, France. 39CH Annecy, France. 40RENARCI, Annecy, France. 41CH Métropole Savoie, Cambery, France. 42REACTing, Paris, France. 43INSERM CIC-1414, Rennes, France. 44Hôpital la Timone, Marseille, France. 45Vaccine Research Insitute (VRI), INSERM UMR 955, Créteil, France.

**Members of the Imagine COVID-Group:** Jean-Philippe Annereau1, Luis Briseño-Roa1, Olivier Gribouval2, Jean-Philippe Jaïs2,3, Anna Pelet2

1Medetia Pharmaceuticals, Paris, France. 2Imagine Institute, Université de Paris, INSERM UMR 1163, Paris, France. 3Department of Biostatistics, Hôpital Necker, University of Paris, Paris, France.

**Members of the The Milieu Intérieur Consortium:** Laurent Abel1, Andres Alcover2, Hugues Aschard2, Philippe Bousso2, Nollaig Bourke3, Petter Brodin4, Pierre Bruhns2, Nadine Cerf-Bensussan5, Ana Cumano2, Christophe D’Enfert2, Ludovic Deriano2, Marie-Agnès Dillies2, James Di Santo2, Françoise Dromer2, Gérard Eberl2, Jost Enninga2, Jacques Fellay6, Ivo Gomperts-Boneca2, Milena Hasan2, Gunilla Karlsson Hedestam4, Serge Hercberg7, Molly A. Ingersoll2, Olivier Lantz8, Rose Anne Kenny3, Mickaël Ménager5, Frédérique Michel2, Hugo Mouquet2, Cliona O’Farrelly3, Etienne Patin2, Sandra Pellegrini2, Antonio Rausell5, Frédéric Rieux-Laucat5, Lars Rogge2, Magnus Fontes9, Anavaj Sakuntabhai2, Olivier Schwartz2, Benno Schwikowski2, Spencer Shorte2, Frédéric Tangy2, Antoine Toubert10, Mathilde Touvier7, Marie-Noëlle Ungeheuer2, Christophe Zimmer2, Matthew L. Albert11, Darragh Duffy2, Lluis Quintana-Murci2

1Hôpital Necker, Paris, France. 2Institut Pasteur, Paris, France. 3Trinity College, Dublin, Ireland. 4Karolinska Institutet, Stockholm, Sweden. 5INSERM U1163, Institut Imagine, Paris, France. 6EPFL, Lausanne, Switzerland. 7Sorbonne Paris Nord University, INSERM U1153, INRAE U1125, CNAM, Nutritional Epidemiology Research Team (EREN), Epidemiology and Statistics Research Center – University of Paris (CRESS), Bobigny, France.8Institut Curie, Paris, France. 9Institut Roche, Paris, France. 10Hôpital Saint-Louis, Paris, France. 11In Sitro, San Francisco, USA.

**Members of the CoV-Contact Cohort:** Loubna Alavoine1, Sylvie Behillil2, Charles Burdet3, Charlotte Charpentier3,4, Aline Dechanet5, Diane Descamps3,6, Xavier Duval1,3, Jean-Luc Ecobichon1, Vincent Enouf8, Wahiba Frezouls1, Nadhira Houhou5, Ouifiya Kafif5, Jonathan Lehacaut1, Sophie Letrou1, Bruno Lina9, Jean-Christophe Lucet10, Pauline Manchon5, Mariama Nouroudine1, Valentine Piquard5, Caroline Quintin1, Michael Thy11, Sarah Tubiana1, Sylvie van der Werf8, Valérie Vignali1, Benoit Visseaux3,10, Yazdan Yazdanpanah3,10, Abir Chahine12, Nawal Waucquier12, Maria-Claire Migaud12, Dominique Deplanque12, Félix Djossou13, Mayka Mergeay-Fabre14, Aude Lucarelli15, Magalie Demar13, Léa Bruneau16, Patrick Gérardin17, Adrien Maillot16, Christine Payet18, Bruno Laviolle19, Fabrice Laine19, Christophe Paris19, Mireille Desille-Dugast19, Julie Fouchard19, Denis Malvy20, Duc Nguyen20, Thierry Pistone20, Pauline Perreau20, Valérie Gissot21, Carole Le Goas21, Samatha Montagne22, Lucie Richard23, Catherine Chirouze24, Kévin Bouiller24, Maxime Desmarets25, Alexandre Meunier26, Marilou Bourgeon26, Benjamin Lefèvre27, Hélène Jeulin28, Karine Legrand29, Sandra Lomazzi30, Bernard Tardy31, Amandine Gagneux-Brunon32, Frédérique Bertholon33, Elisabeth Botelho-Nevers32, Christelle Kouakam34, Nicolas Leturque34, Layidé Roufai34, Karine Amat35, Sandrine Couffin-Cadiergues34, Hélène Espérou36, Samia Hendou34.

1Centre d’Investigation Clinique, INSERM CIC 1425, Hôpital Bichat Claude Bernard, APHP, Paris, France. 2Institut Pasteur, Paris, France. 3Université de Paris, IAME, INSERM U1137, Paris, France, Hôpital Bichat Claude Bernard, APHP, Paris, France. 4Service de Virologie, Université de Paris, INSERM, IAME, UMR 1137, AP-HP, Hôpital Bichat-Claude Bernard, F-75018 Paris, France. 6IAME INSERM U1140, Hôpital Bichat Claude Bernard, APHP, Paris, France. 7Centre d’Investigation Clinique, INSERM CIC 1425, APHP, IAME, Paris University, Paris, France. 8Institut Pasteur, U3569 CNRS, Université de Paris, Paris, France. 9Virpath Laboratory, International Center of Research in Infectiology, Lyon University, INSERM U1111, CNRS U5308, ENS, UCBL, Lyon, France. 10IAME INSERM U1138, Hôpital Bichat Claude Bernard, APHP, Paris, France. 11Center for Clinical Investigation, Assistance Publique-Hôpitaux de Paris, Bichat-Claude Bernard University Hospital, Paris, France. 12Centre d’Investigation Clinique, INSERM CIC 1403, Centre Hospitalo Universitaire de Lille, Lille, France. 13Center of Biological Resource (CRB Amazonie), Centre Hospitalier de Cayenne Andrée Rosemon, Guiana, France. 14Centre d’Investigation Clinique, INSERM CIC 1424, Centre Hospitalier de Cayenne, Cayenne, Guyane Française. 15Service Hôpital de jour Adulte, Centre Hospitalier de Cayenne, Guyane, France. 16Centre d’Investigation Clinique, INSERM CIC 1410, Centre Hospitalo universitaire de la Réunion, La Réunion, France. 17Centre d’Investigation Clinique, INSERM CIC 1410, CHU Reunion, Saint-Pierre, Reunion island. 18Centre de Ressources Biologiques, Centre Hospitalo universitaire de la Réunion, La Réunion, France. 19CRB Santé, INSERM U1241, Université de Rennes 1, Centre hospitalier universitaire de Rennes, Rennes, France. 20Service des maladies infectieuses, Centre Hospitalo universitaire de Bordeaux, Bordeaux, France. 21Centre d’Investigation Clinique, INSERM CIC 1415, CHRU Tours, Tours, France. 22CRBT, Centre Hospitalo universitaire de Tours, Tours, France. 23Pole de Biologie Médicale, Centre Hospitalo universitaire de Tours, Tours, France. 24Service des maladies infectieuses, Centre Hospitalo universitaire de Besançon, Besançon, France. 25Service des maladies infectieuses, Centre d’investigation clinique, INSERM CIC1431, Centre Hospitalier Universitaire de Besançon, Besançon, France. 26Centre de Ressources Biologiques - Filière Microbiologique de Besançon, Centre Hospitalier Universitaire, Besançon, France. 27Université de Lorraine, CHRU-Nancy and APEMAC, Infectious and tropical diseases, Nancy, France. 28Laboratoire de Virologie, CHRU de Nancy Brabois, Vandoeuvre-lès-Nancy, France. 29INSERM CIC-EC 1433, Centre Hospitalo universitaire de Nancy, Nancy, France. 30Centre de ressources Biologiques, Centre Hospitalo universitaire de Nancy, Nancy, France. 31Centre d’Investigation Clinique, INSERM CIC 1408, Centre Hospitalo universitaire de Saint-Étienne, Saint-Étienne, France. 32Service des maladies infectieuses, Centre Hospitalo universitaire de Saint-Étienne, Saint-Étienne, France. 33Service des maladies infectieuses, CRB42-BTK, Centre Hospitalo Universitaire de Saint-Étienne, Saint-Étienne, France. 34Pole Recherche Clinique, INSERM, Paris France. 35IMEA Fondation Léon M’Ba, Paris, France. 36INSERM Pôle Recherche Clinique, Paris, France.

**Members of the Amsterdam UMC Covid-19 Biobank:** Michiel van Agtmael2, Anne Geke Algera1, Brent Appelman2, Frank van Baarle1, Diane Bax3, Martijn Beudel4, Harm Jan Bogaard5, Marije Bomers2, Peter Bonta5, Lieuwe Bos1, Michela Botta1, Justin de Brabander2, Godelieve de Bree2, Sanne de Bruin1, David T. P. Buis1, Marianna Bugiani5, Esther Bulle1, Osoul Chouchane2 Alex Cloherty3, Mirjam Dijkstra12, Dave A. Dongelmans1, Romein W. G. Dujardin1, Paul Elbers1, Lucas Fleuren1, Suzanne Geerlings2 Theo Geijtenbeek3, Armand Girbes1, Bram Goorhuis2, Martin P. Grobusch2, Florianne Hafkamp3, Laura Hagens1, Jorg Hamann7, Vanessa Harris2, Robert Hemke8, Sabine M. Hermans2 Leo Heunks1, Markus Hollmann6, Janneke Horn1, Joppe W. Hovius2, Menno D. de Jong9, Rutger Koning4, Endry H. T. Lim1, Niels van Mourik1, Jeaninne Nellen2, Esther J. Nossent5, Frederique Paulus1, Edgar Peters2, Dan A. I. Pina-Fuentes4, Tom van der Poll2, Bennedikt Preckel6, Jan M. Prins2, Jorinde Raasveld1, Tom Reijnders2, Maurits C. F. J. de Rotte12, Michiel Schinkel2, Marcus J. Schultz1, Femke A. P. Schrauwen12, Alex Schuurman10, Jaap Schuurmans1, Kim Sigaloff1, Marleen A. Slim1,2, Patrick Smeele5, Marry Smit1, Cornelis S. Stijnis2, Willemke Stilma1, Charlotte Teunissen11, Patrick Thoral1, Anissa M. Tsonas1, Pieter R. Tuinman2, Marc van der Valk2, Denise Veelo6, Carolien Volleman1, Heder de Vries1, Lonneke A. Vught1,2, Michèle van Vugt2, Dorien Wouters12, A. H. (Koos) Zwinderman13, Matthijs C. Brouwer4, W. Joost Wiersinga2, Alexander P. J. Vlaar1, Diederik van de Beek4

1Department of Intensive Care, Amsterdam UMC, Amsterdam, Netherlands. 2Department of Infectious Diseases, Amsterdam UMC, Amsterdam, Netherlands. 3Experimental Immunology, Amsterdam UMC, Amsterdam, Netherlands. 4Department of Neurology, Amsterdam UMC, Amsterdam Neuroscience, Amsterdam, Netherlands. 5Department of Pulmonology, Amsterdam UMC, Amsterdam, Netherlands. 6Department of Anesthesiology, Amsterdam UMC, Amsterdam, Netherlands. 7Amsterdam UMC Biobank Core Facility, Amsterdam UMC, Amsterdam, Netherlands. 8Department of Radiology, Amsterdam UMC, Amsterdam, Netherlands. 9Department of Medical Microbiology, Amsterdam UMC, Amsterdam, Netherlands. 10Department of Internal Medicine, Amsterdam UMC, Amsterdam, Netherlands. 11Neurochemical Laboratory, Amsterdam UMC, Amsterdam, Netherlands. 12Department of Clinical Chemistry, Amsterdam UMC, Amsterdam, Netherlands. 13Department of Clinical Epidemiology, Biostatistics and Bioinformatics, Amsterdam UMC, Amsterdam, Netherlands.

**Members of the COVID Human Genetic Effort:** Laurent Abel1, Alessandro Aiuti2, Saleh Al-Muhsen3, Fahd Al-Mulla4, Mark S. Anderson5, Evangelos Andreakos6, Andrés A. Arias7, Hagit Baris Feldman8, Alexandre Belot9, Catherine M. Biggs10, Dusan Bogunovic11, Alexandre Bolze12, Anastasiia Bondarenko13, Ahmed A. Bousfiha14, Petter Brodin15, Yenan Bryceson16, Carlos D. Bustamante17, Manish J. Butte18, Giorgio Casari19, Samya Chakravorty20, John Christodoulou21, Antonio Condino-Neto22, Stefan N. Constantinescu23, Megan A. Cooper24, Clifton L. Dalgard25, Murkesh Desai26, Beth A. Drolet27, Jamila El Baghdadi28, Sara Espinosa-Padilla29, Jacques Fellay30, Carlos Flores31, José Luis Franco7, Antoine Froidure32, Peter K. Gregersen33, Filomeen Haerynck34, David Hagin35, Rabih Halwani36, Lennart Hammarström37, James R. Heath38, Sarah E. Henrickson39, Elena W. Y. Hsieh40, Eystein S. Husebye41, Kohsuke Imai42, Yuval Itan43, Erich D. Jarvis44, Timokratis Karamitros45, Kai Kisand46, Cheng-Lung Ku47, Yu-Lung Lau48, Yun Ling49, Carrie L. Lucas50, Tom Maniatis51, Davood Mansouri52, László Maródi53, Isabelle Meyts54, Joshua D. Milner55, Kristina Mironska56, Trine H. Mogensen57, Tomohiro Morio58, Lisa F. P. Ng59, Luigi D. Notarangelo60, Antonio Novelli61, Giuseppe Novelli62, Cliona O’Farrelly63, Satoshi Okada64, Tayfun Ozcelik65, Qiang Pan-Hammarström37, Rebeca Perez de Diego66, Anna M. Planas67, Jordi Perez-Tur99, Lisa M. Arkin100, Takaki Asano101, Roger Colobran Oriol102, Carolina Prando68, Aurora Pujol69, Lluis Quintana-Murci70, Laurent Renia59, Igor Resnick71, Carlos Rodríguez-Gallego72, Vanessa Sancho-Shimizu73, Anna Sediva74, Mikko R.J. Seppänen75, Mohammed Shahrooei76, Anna Shcherbina77, Ondrej Slaby78, Andrew L. Snow79, Pere Soler-Palacín80, András N. Spaan81, Ivan Tancevski82, Stuart G. Tangye83, Ahmad Abou Tayoun84, Sathishkumar Ramaswamy84, Stuart E. Turvey85, K. M. Furkan Uddin86, Mohammed J. Uddin87, Diederik van de Beek88, Donald C. Vinh89, Horst von Bernuth90, Mayana Zatz91, Pawel Zawadzki92, Bodo Grimbacher93, Keisuke Okamoto94, Jean W. Pape95, David S. Perlin96, Graziano Pesole97, Joost Wauters98, Helen C. Su60, Jean-Laurent Casanova103

1INSERM U1163, University of Paris, Imagine Institute, Paris, France. 2San Raffaele Telethon Institute for Gene Therapy, IRCCS Ospedale San Raffaele, and Vita Salute San Raffaele University, Milan, Italy. 3Immunology Research Laboratory, Department of Pediatrics, College of Medicine and King Saud University Medical City, King Saud University, Riyadh, Saudi Arabia. 4Dasman Diabetes Institute, Department of Genetics and Bioinformatics, Dasman, Kuwait. 5Diabetes Center, University of California San Francisco, San Francisco, CA, USA. 6Laboratory of Immunobiology, Center for Clinical, Experimental Surgery and Translational Research, Biomedical Research Foundation of the Academy of Athens, Athens, Greece. 7Group of Primary Immunodeficiencies, University of Antioquia UdeA, Medellin, Colombia. 8The Genetics Institute, Tel Aviv Sourasky Medical Center and Sackler Faculty of Medicine, Tel Aviv University, Tel Aviv, Israel. 9Pediatric Nephrology, Rheumatology, Dermatology, HFME, Hospices Civils de Lyon, National Referee Centre RAISE, and INSERM U1111, Université de Lyon, Lyon, France. 10Department of Pediatrics, British Columbia Children’s Hospital, The University of British Columbia, Vancouver, BC, Canada 11Icahn School of Medicine at Mount Sinai, New York, NY, USA. 12Helix, San Mateo, CA, USA. 13Shupyk National Medical Academy for Postgraduate Education, Kiev, Ukraine. 14Clinical Immunology Unit, Department of Pediatric Infectious Disease, CHU Ibn Rushd and LICIA, Laboratoire d’Immunologie Clinique, Inflammation et Allergie, Faculty of Medicine and Pharmacy, Hassan II University, Casablanca, Morocco. 15SciLifeLab, Department of Women’s and Children’s Health, Karolinska Institutet, Stockholm, Sweden 16Department of Medicine, Center for Hematology and Regenerative Medicine, Karolinska Institutet, Stockholm, Sweden. 17Stanford University, Stanford, CA, USA. 18Division of Immunology, Allergy, and Rheumatology, Department of Pediatrics and the Department of Microbiology, Immunology, and Molecular Genetics, University of California, Los Angeles, CA, USA. 19Clinical Genomics, IRCCS San Raffaele Scientific Institute and Vita-Salute San Raffaele University, Milan, Italy 20Department of Pediatrics and Children’s Healthcare of Atlanta, Emory University, Atlanta, GA, USA. 21Murdoch Children’s Research Institute and Department of Paediatrics, University of Melbourne, Australia 22Department of Immunology, Institute of Biomedical Sciences, University of São Paulo, São Paulo, Brazil. 23de Duve Institute and Ludwig Cancer Research, Brussels, Belgium 24Washington University School of Medicine, St. Louis, MO, USA. 25Department of Anatomy, Physiology & Genetics, Uniformed Services University of the Health Sciences, Bethesda, MD, USA. 26Bai Jerbai Wadia Hospital for Children, Mumbai, India. 27School of Medicine and Public Health, University of Wisconsin, Madison, WI, USA. 28Genetics Unit, Military Hospital Mohamed V, Rabat, Morocco. 29Instituto Nacional de Pediatria (National Institute of Pediatrics), Mexico City, Mexico. 30School of Life Sciences, Ecole Polytechnique Fédérale de Lausanne, Lausanne, Switzerland; Precision Medicine Unit, Lausanne University Hospital and University of Lausanne, Lausanne, Switzerland. 31Genomics Division, Instituto Tecnológico y de Energías Renovables (ITER), Santa Cruz de Tenerife, Spain; Research Unit, Hospital Universitario N.S. de Candelaria, Santa Cruz de Tenerife, Spain; Instituto de Tecnologías Biomédicas (ITB), Universidad de La Laguna, San Cristóbal de La Laguna, Spain; CIBER de Enfermedades Respiratorias, Instituto de Salud Carlos III, Madrid, Spain. 32Pulmonology Department, Cliniques Universitaires Saint-Luc; Institut de Recherche Expérimentale et Clinique (IREC), Université Catholique de Louvain, Brussels, Belgium. 33Feinstein Institute for Medical Research, Northwell Health USA, Manhasset, NY, USA. 34Department of Paediatric Immunology and Pulmonology, Centre for Primary Immunodeficiency Ghent (CPIG), PID Research Laboratory, Jeffrey Modell Diagnosis and Research Centre, Ghent University Hospital, Ghent, Belgium. 35The Genetics Institute Tel Aviv Sourasky Medical Center, Tel Aviv, Israel. 36Sharjah Institute of Medical Research, College of Medicine, University of Sharjah, Sharjah, United Arab Emirates. 37Department of Biosciences and Nutrition, Karolinska Institutet, Stockholm, Sweden. 38Institute for Systems Biology, Seattle, WA, USA. 39Department of Pediatrics, Division of Allergy Immunology, Children’s Hospital of Philadelphia, Philadelphia, PA, USA; Department of Microbiology, Perelman School of Medicine, University of Pennsylvania, Philadelphia, PA, USA. 40Departments of Pediatrics, Immunology and Microbiology, University of Colorado, School of Medicine, Aurora, Colorado, USA. 41 Department of Clinical Science and K.G. Jebsen Center for Auoimmune Diseases, University of Bergen, Bergen, Norway. 42Department of Community Pediatrics, Perinatal and Maternal Medicine, Tokyo Medical and Dental University (TMDU) 43Institute for Personalized Medicine, Icahn School of Medicine at Mount Sinai, New York, NY, USA; Department of Genetics and Genomic Sciences, Icahn School of Medicine at Mount Sinai, New York, NY, USA. 44Laboratory of Neurogenetics of Language and Howard Hughes Medical Institute, The Rockefeller University, New York, NY, USA. 45Bioinformatics and Applied Genomics Unit, Hellenic Pasteur Institute, Athens, Greece 46Molecular Pathology, Department of Biomedicine, Institute of Biomedicine and Translational Medicine, University of Tartu, Tartu Estonia. 47Chang Gung University, Taoyuan County, Taiwan. 48Department of Paediatrics & Adolescent Medicine, The University of Hong Kong, Hong Kong, China. 49Shanghai Public Health Clinical Center, Fudan University, Shanghai, China. 50Department of Immunobiology, Yale University School of Medicine, New Haven, CT, USA. 51Columbia University Zuckerman Institute, New York, NY, USA. 52Department of Clinical Immunology and Infectious Diseases, National Research Institute of Tuberculosis and Lung Diseases, The Clinical Tuberculosis and Epidemiology Research Center, National Research Institute of Tuberculosis and Lung Diseases (NRITLD), Masih Daneshvari Hospital, Shahid Beheshti University of Medical Sciences, Tehran, Iran. 53Primary Immunodeficiency Clinical Unit and Laboratory, Department of Dermatology, Venereology and Dermatooncology, Semmelweis University, Budapest, Hungary. 54Department of Pediatrics, University Hospitals Leuven, Department of Microbiology, Immunology and Transplantation, and Laboratory for Inborn Errors of Immunity, KU Leuven, Leuven, Belgium. 55Department of Pediatrics, Columbia University Irving Medical Center, New York, NY, USA. 56University Clinic for Children’s Diseases, Department of Pediatric Immunology, Medical Faculty, University “St.Cyril and Methodij” Skopje, North Macedonia. 57Department of Biomedicine, Aarhus University, Aarhus, Denmark 58Tokyo Medical & Dental University Hospital, Tokyo, Japan. 59A*STAR Infectious Disease Labs, Agency for Science, Technology and Research, Singapore; Lee Kong Chian School of Medicine, Nanyang Technology University, Singapore. 60National Institute of Allergy and Infectious Diseases, National Institutes of Health, Bethesda, MD, USA. 61Laboratory of Medical Genetics, IRCCS Bambino Gesù Children’s Hospital, Rome, Italy. 62Department of Biomedicine and Prevention, Tor Vergata University of Rome, Rome, Italy. 63Comparative Immunology Group, School of Biochemistry and Immunology, Trinity Biomedical Sciences Institute, Trinity College Dublin, Ireland. 64Department of Pediatrics, Graduate School of Biomedical and Health Sciences, Hiroshima University, Hiroshima, Japan. 65Department of Molecular Biology and Genetics, Bilkent University, Bilkent, Ankara, Turkey. 66Laboratory of Immunogenetics of Human Diseases, Innate Immunity Group, IdiPAZ Institute for Health Research, La Paz Hospital, Madrid, Spain. 67IIBB-CSIC, IDIBAPS, Barcelona, Spain. 68Faculdades Pequeno Príncipe, Instituto de Pesquisa Pelé Pequeno Príncipe, Curitiba, Brazil. 69Neurometabolic Diseases Laboratory, Bellvitge Biomedical Research Institute (IDIBELL), L’Hospitalet de Llobregat, Barcelona, Spain; Catalan Institution of Research and Advanced Studies (ICREA), Barcelona, Spain; Center for Biomedical Research on Rare Diseases (CIBERER), ISCIII, Barcelona, Spain. 70Human Evolutionary Genetics Unit, CNRS U2000, Institut Pasteur, Paris, France; Human Genomics and Evolution, Collège de France, Paris, France. 71Department of Medical Genetics, Medical University, Varna and Department Hematology and BMT, University Hospital St. Marina, Bulgaria. 72Department of Immunology, University Hospital of Gran Canaria Dr. Negrín, Canarian Health System, Las Palmas de Gran Canaria, Spain; Department of Clinical Sciences, University Fernando Pessoa Canarias, Las Palmas de Gran Canaria, Spain 73Department of Paediatric Infectious Diseases and Virology, Imperial College London, London, UK; Centre for Paediatrics and Child Health, Faculty of Medicine, Imperial College London, London, UK. 74Department of Immunology, Second Faculty of Medicine Charles University, V Uvalu, University Hospital in Motol, Prague, Czech Republic. 75Adult Immunodeficiency Unit, Infectious Diseases, Inflammation Center, University of Helsinki and Helsinki University Hospital, Helsinki, Finland; Rare Diseases Center and Pediatric Research Center, Children’s Hospital, University of Helsinki and Helsinki University Hospital, Helsinki, Finland 76Saeed Pathobiology and Genetics Lab, Tehran, Iran; Department of Microbiology and Immunology, Clinical and Diagnostic Immunology, KU Leuven, Leuven, Belgium. 77Department of Immunology, Dmitry Rogachev National Medical Research Center of Pediatric Hematology, Oncology and Immunology, Moscow, Russia. 78Central European Institute of Technology & Department of Biology, Faculty of Medicine, Masaryk University, Brno, Czech Republic. 79Department of Pharmacology & Molecular Therapeutics, Uniformed Services University of the Health Sciences, Bethesda, MD, USA. 80Pediatric Infectious Diseases and Immunodeficiencies Unit, Vall d’Hebron Barcelona Hospital Campus, Barcelona, Spain. 81St. Giles Laboratory of Human Genetics of Infectious Diseases, Rockefeller Branch, The Rockefeller University, New York, NY, USA; Department of Medical Microbiology, University Medical Center Utrecht, Utrecht, Netherlands 82Department of Internal Medicine II, Medical University of Innsbruck, Innsbruck, Austria. 83Garvan Institute of Medical Research, Darlinghurst, NSW, Australia; St Vincent’s Clinical School, Faculty of Medicine, UNSW Sydney, NSW, Australia. 84Al Jalila Children’s Hospital, Dubai, UAE 85BC Children’s Hospital, The University of British Columbia, Vancouver, Canada 86Centre for Precision Therapeutics, Genetic and Genomic Medicine Centre, NeuroGen Children Healthcare, Dhaka, Bangladesh; Holy Family Red Crescent Medical College, Dhaka, Bangladesh. 87College of Medicine, Mohammed Bin Rashid University of Medicine and Health Sciences, Dubai, UAE; Cellular Intelligence (Ci) Lab, GenomeArc Inc., Toronto, ON, Canada 88Department of Neurology, Amsterdam Neuroscience, Amsterdam University Medical Center, University of Amsterdam, Amsterdam, The Netherlands. 89Department of Medicine, Division of Infectious Diseases, McGill University Health Centre, Montréal, Québec, Canada; Infectious Disease Susceptibility Program, Research Institute, McGill University Health Centre, Montréal, Québec, Canada. 90Department of Pediatric Pneumology, Immunology and Intensive Care, Charité Universitätsmedizin, Berlin University Hospital Center, Berlin, Germany; Labor Berlin GmbH, Department of Immunology, Berlin, Germany; Berlin Institutes of Health (BIH), Berlin-Brandenburg Center for Regenerative Therapies, Berlin, Germany. 91Biosciences Institute, University of São Paulo, São Paulo, Brazil. 92Molecular Biophysics Division, Faculty of Physics, A. Mickiewicz University, Poznań, Poland. 93Center for Chronic Immunodeficiency & Institute for Immunodeficiency, Medical Center, Faculty of Medicine, University of Freiburg, Freiburg, Germany. 94Tokyo Medical and Dental University, Tokyo, Japan. 95Haitian Study Group for Kaposi's Sarcoma and Opportunistic Infections (GHESKIO), Port-au-Prince, Haiti. 96Center for Discovery and Innovation, Hackensack Meridian Health, Nutley, NJ, USA. 97Department of Biosciences, Biotechnology and Biopharmaceutics, University of Bari A. Moro, Bari,Italy. 98Department of General Internal Medicine, Medical Intensive Care Unit, University Hospitals Leuven, Leuven, Belgium. 99Institut de Biomedicina de València-CSIC, CIBERNED, Unitat Mixta de Neurologia i Genètica, IIS La Fe, Vallencia, Spain. 100Pediatric Dermatology, University of Wisconsin School of Medicine, Madison, WI, USA. 101St. Giles Laboratory of Human Genetics of Infectious Diseases, Rockefeller Branch, The Rockefeller University, New York, NY, USA. 102Hospital Universitari Vall d'Hebron (HUVH); Vall d'Hebron Institut de Recerca (VHIR), Barcelona, Spain 103The Rockefeller University & Howard Hughes Medical Institute, New York, NY, USA; Necker Hospital for Sick Children & INSERM, Paris, France.

**Members of the CP-COVID-19 Group:** Paula Andrea Gaviria García1, Gustavo Andrés Salguero López1, Adriana Rojas-Villaraga2, Verónica Posada Vélez3, Lina Marcela Acevedo Landinez1, Luisa Paola Duarte Correales1, Oscar Gómez4, Jeser Santiago Grass Guaqueta1, Cristian Alejandro Ricaurte Pérez1, Jorge Carrillo5, José Alejandro Daza Vergara5, Sandra Landinez5, Rubén D. Mantilla6, Jairo David Torres Yepes3, Oscar Andrés Briceño Ricaurte3, Carlos E. Pérez-Díaz7, Yady Nataly Mateus8, Laura Mancera Navarro8, Yhojan Rodríguez6, Yeny Acosta-Ampudia6, Diana M. Monsalve6, Manuel Rojas6

1Instituto Distrital de Ciencia Biotecnología e Investigación en Salud, IDCBIS, Bogota, Colombia., 2Fundación Universitaria de Ciencias de la Salud, FUCS Bogota, Colombia., 3Internal Medicine Department, Universidad CES, Medellin, Colombia., 4Genoma CES, Universidad CES, Medellin, Colombia., 5Hospital Universitario Mayor Méderi, Bogota, Colombia., 6Center for Autoimmune Disease Research (CREA), School of Medicine and Health Sciences, Universidad del Rosario, Bogota, Colombia., 7Infectious diseases, Clínica de Marly, Bogota, Colombia., 8Clínica del Occidente, Bogota, Colombia.

**Members of the CONSTANCES cohort:** Rachel Nadif1, Marcel Goldberg2, Anna Ozguler2, Joseph Henny2, Sylvie Lemonnier2, Mireille Coeuret-Pellicer3, Stéphane Le Got2, Marie Zins2

1Université de Paris-Saclay, UVSQ, Université Paris-Sud, Inserm, Equipe d’Epidémiologie Respiratoire Intégrative, Inserm CESP, Villejuif, France. 2Université de Paris, Université Paris-Saclay, UVSQ, Inserm UMS11, Villejuif, France. 3Inserm U011 Constances cohort, Villejuif, France.

**Members of the 3C-Dijon Study:** Christophe Tzourio1, Stéphanie Debette2, Carole Dufouil1, Aïcha Soumaré1, Morgane Lachaize2, Nathalie Fievet3, Amandine Flaig3

1University of Bordeaux; Bordeaux Population Health Center, INSERM U1219, Bordeaux, France. 2University of Bordeaux; Bordeaux Population Health Center, INSERM U1219; Bordeaux University Hospital, Department of Neurology, Institute of Neurodegenerative Diseases, Bordeaux, France. 3Laboratoire d’Analyses Génomiques - Centre de Ressources Biologiques; Institut Pasteur de Lille, Lille, France.

**Member of the Cerba HealthCare:** Fernando Martin1

1Cerba HealthCare, Issy-les-Moulineaux, France.

**Members of the Etablissement du Sang study group:** Brigitte Bonneaudeau1, Fabrice Cognasse5,6, Dorothée Cannet2, Pierre Gallian3, Michel Jeanne4, Pascal Morel1, Magali Perroquin4, Pascale Richard1, Pierre Tiberghien1, Hind Hamzeh-Cognasse5,6

1Etablissement Français du sang, La Plaine St-Denis, France. 2Etablissement Français du sang, Dijon, France. 3Etablissement Français du sang, Marseille, France. 4Etablissement Français du sang, Bordeaux, France. 5Etablissement Français du sang, Saint-Étienne, France. 6SAINBIOSE, INSERM, U1059, University of Lyon, Université Jean-Monnet Saint-Étienne.
